# Supplementary material for: Novel pyrazoline and pyrazole “turn on” fluorescent sensors selective for Zn 2+ /Cd 2+ at λ em 480 nm and Fe 3+ /Fe 2+ at λ em 465 nm in MeCN
Source: Royal Society of Chemistry journal article supplement (doi:10.1039/d4ra00036f), 2024-01-01

## Electronic Supplementary Information <sup>†</sup>

### Novel pyrazoline and pyrazole “turn on” fluorescent sensors selective for $\text{Zn}^{2+}$ / $\text{Cd}^{2+}$ at $\lambda_{\text{em}}$ 480 nm and $\text{Fe}^{3+}$ / $\text{Fe}^{2+}$ at $\lambda_{\text{em}}$ 465 nm in MeCN

Alexander Ciupa\*

|                                                                |         |
|----------------------------------------------------------------|---------|
| General Experimental <b>S1</b> .....                           | Page 2  |
| Synthetic Procedure <b>S2</b> .....                            | Page 3  |
| NMR Spectra of Compounds <b>S3</b> .....                       | Page 12 |
| Absorbance Spectra and Extinction Coefficients <b>S4</b> ..... | Page 22 |
| Job Plot Analysis <b>S5</b> .....                              | Page 24 |
| Fluorescence Spectra <b>S6</b> .....                           | Page 26 |
| Limit of Detection Calculations <b>S7</b> .....                | Page 30 |

## General Experimental (S1)

Chemicals, solvents and reagents were purchased from commercial sources and used without further purification. PE refers to petroleum ether, bp 40-60 °C. Spectroscopy was performed with CHROMASOLV® gradient grade acetonitrile for HPLC, ≥99.9%, from Sigma-Aldrich.

The metal complexes used in this study were: LiCl, NaCl, KCl, CaCl<sub>2</sub>, CuCl<sub>2</sub>, NiCl<sub>2</sub>, ZnCl<sub>2</sub>, CdCl<sub>2</sub>, RuCl<sub>3</sub>, CoCl<sub>2</sub>, MnCl<sub>2</sub>, PbCl<sub>2</sub>, ZnCl<sub>2</sub>, FeSO<sub>4</sub> and FeCl<sub>3</sub>.

TLCs were carried out on Merck Aluminium backed TLC plates Silica Gel 60 F254 and viewed using UV light of wavelength 254 nm. Merck Silica Gel (0.040-0.063 mm) was used for column chromatography. Compounds were loaded as an oil, CH<sub>2</sub>Cl<sub>2</sub> solution or dry loaded by adsorption onto silica.

NMR spectra were obtained on a Bruker Avance III (400 MHz) spectrometer and processed via TopSpin® software. The chemical shifts are recorded in parts per million (ppm) with reference to tetramethylsilane. The coupling constants *J* are quoted to the nearest 0.5 Hz and are not corrected.

High resolution Mass spectroscopy was performed on Bruker Quadrupole Time-of-Flight (qToF) mass spectrometer.

UV/Vis spectroscopy was performed on an Agilent Cary5000 in quartz cuvettes with a 1 cm pathlength using HPLC grade MeCN, 250-500 nm range with 0.2 sec dwell time. Detector switchover occurred at 350 nm.

FTIR spectroscopy was performed on a Bruker VERTEX 70 spectrometer.

Fluorescence spectroscopy was performed on an Edinburgh Instruments FLS1000 with a xenon excitation source, 5 nm bandwidths for both excitation and emission monochromator, scan speed of 1 nm and dwell time of 0.2 sec. Fluorescence quartz cuvettes with a 1 cm pathlength were used throughout with HPLC grade MeCN.

A 100 Watt 365 nm Analytikjena High intensity UV lamp or 254 nm 6 Watt Analytikjena TLC lamp was used for images of samples in cuvettes.

All figures were plotted using SigmaPlot® 14.5 software.

## Synthetic Procedures (S2)

Synthesis of (E)-1-(6-acetylpyridin-2-yl)-3-phenylprop-2-en-1-one (**1**)

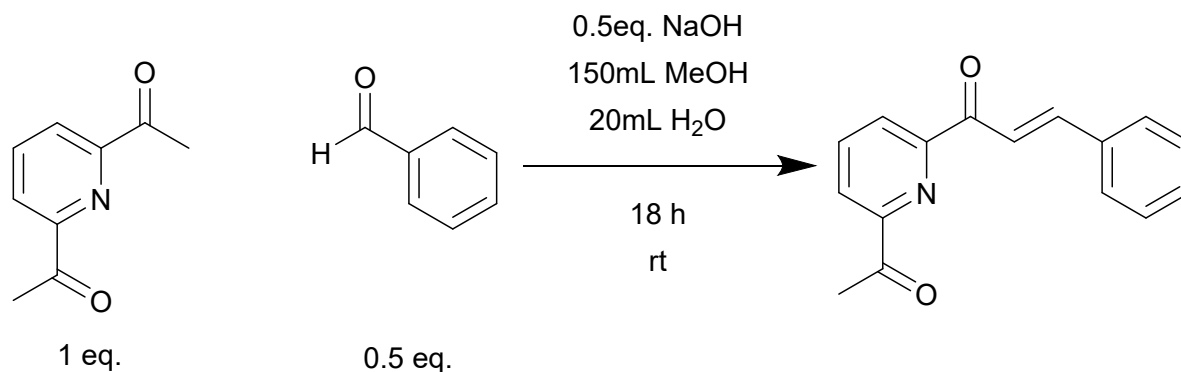

Benzaldehyde (0.318 g, 3 mmol) was added to a stirred solution of 2,6-Diacetylpyridine (0.978 g, 6 mmol) in 150 mL MeOH until fully dissolved. Sodium hydroxide (0.12 g, 3 mmol) dissolved in 20 mL water was added slowly over the course of 1 min and then left to stir at room temperature for 18 hours. After 18 hours the precipitate (unwanted bis-chalcone (2E,2'E)-1,1'-(pyridine-2,6-diyl)bis(3-phenylprop-2-en-1-one)) was removed via filtration, the solvent removed under reduced pressure and the resulting solid was dissolved in 100 mL ethyl acetate and washed with 3 x 50 mL water (pH 4) washes. The ethyl acetate layer was separated, dried with magnesium sulphate and then the solvent removed under reduced pressure to afford pale yellow solid which was further dried in a drying oven at 80 °C for 24 hours. After 24 hours the required mono chalcone **1** was recrystallised from hexane to afford a pale-yellow solid (0.548 g, 73%).

**M.p** 124 °C (hexane);

**V<sub>max</sub>** (Solid)/cm<sup>-1</sup> 1694, 1355, 994 and 762;

**<sup>1</sup>H NMR** δ<sub>H</sub> (400 MHz; CDCl<sub>3</sub>) 2.90 (3 H, s, CH<sub>3</sub>), 7.48 (3 H, m, CH), 7.75 (2 H, m, CH), 8.04 (2 H, m, CH), 8.26 (1 H, dd, *J* = 7.8 and 1.2 Hz, CH), 8.38 (1 H, d, *J* = 16.0 Hz, CH) and 8.40 (1 H, dd, *J* = 7.8 and 1.2 Hz, CH);

**<sup>13</sup>C NMR** δ<sub>C</sub> (400 MHz; CDCl<sub>3</sub>) 25.8 (CH<sub>3</sub>), 120.3 (CH), 124.6 (CH), 126.1 (CH), 127.5 (CH), 128.8 (CH), 130.1 (CH), 135.0 (Cq), 138.0 (CH), 145.3 (CH), 152.6 (Cq), 153.3 (Cq), 188.6 (Cq) and 199.4 (Cq);

**HRMS** *m/z* (qToF) Found 274.0852(M+Na<sup>+</sup>). C<sub>16</sub>H<sub>14</sub>NO<sub>2</sub> requires 274.0844

Synthesis of (E)-1-(6-acetylpyridin-2-yl)-3-(4-fluorophenyl)prop-2-en-1-one (**2**)

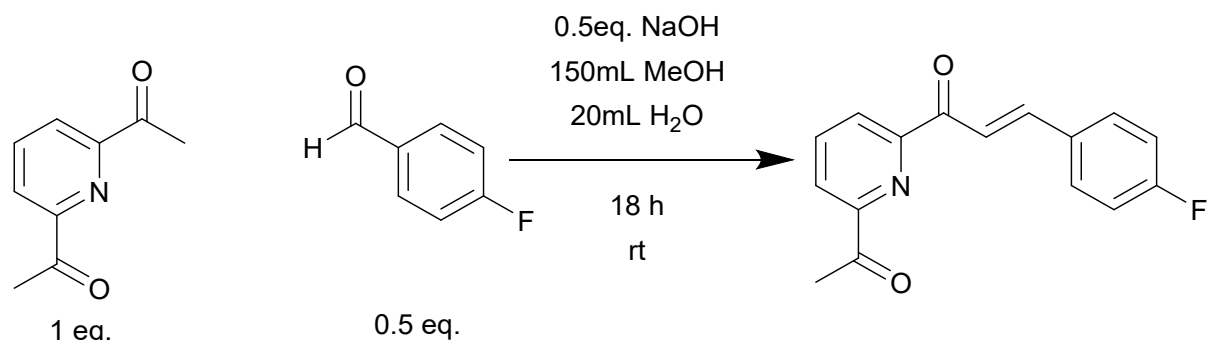

4-Fluorobenzaldehyde (0.728 g, 3mmol) was added to a stirred solution of 2,6-Diacetylpyridine (0.978 g, 6 mmol) in 150 mL MeOH until fully dissolved. Sodium hydroxide (0.12 g, 3 mmol) dissolved in 20 mL water was added slowly over the course of 1 min and then left to stir at room temperature for 18 hours. After 18 hours the precipitate (unwanted bis-chalcone 3-(4-fluorophenyl)-1-(6-((E)-3-(4-fluorophenyl)acryloyl)pyridin-2-yl)prop-2-en-1-one) was removed via filtration, the solvent removed under reduced pressure and the resulting solid was dissolved in 100 mL ethyl acetate and washed with 3 x 50 mL water (pH 4) washes. The ethyl acetate layer was separated, dried with magnesium sulphate and then the solvent removed under reduced pressure to afford pale yellow solid which was further dried in a drying oven at 80 °C for 24 hours. After 24 hours the required mono chalcone **2** was recrystallised from ethyl acetate to afford a pale-yellow solid (0.272 g, 34%).

**M.p** 150 °C (ethyl acetate);

**V<sub>max</sub>** (Solid)/cm<sup>-1</sup> 1695, 1588, 1034 and 796;

**<sup>1</sup>H NMR** δ<sub>H</sub> (400 MHz; CDCl<sub>3</sub>) 2.90 (3 H, s, CH<sub>3</sub>), 7.17 (2 H, m, CH), 7.74 (2 H, m, CH), 7.99 (1 H, d, *J* = 16.0 Hz, CH), 8.06 (1 H, t, *J* = 7.8 Hz, CH), 8.27 (1H, dd, *J* = 7.7 and 1.1 Hz, CH), 8.30, (1H, d, *J* = 16 Hz, CH), 8.40 (1H, dd, *J* = 7.8 and 1.2 Hz, CH);

**<sup>13</sup>C NMR** δ<sub>C</sub> (400 MHz; CDCl<sub>3</sub>) 25.8 (CH<sub>3</sub>), 116.1 (CH), 120.0 (CH), 124.7 (CH), 126.2 (CH), 130.6 (CH), 131.2 (CH), 138.2 (CH), 144.0 (Cq), 152.6 (Cq), 153.3 (Cq), 188.4 (Cq), 199.4 (Cq);

**HRMS** *m/z* (qToF) Found 292.0832 (M+Na<sup>+</sup>). C<sub>16</sub>H<sub>13</sub>FNO<sub>2</sub> requires 292.075.

Synthesis of (E)-1-(6-acetylpyridin-2-yl)-3-(4-methoxyphenyl)prop-2-en-1-one (**3**)

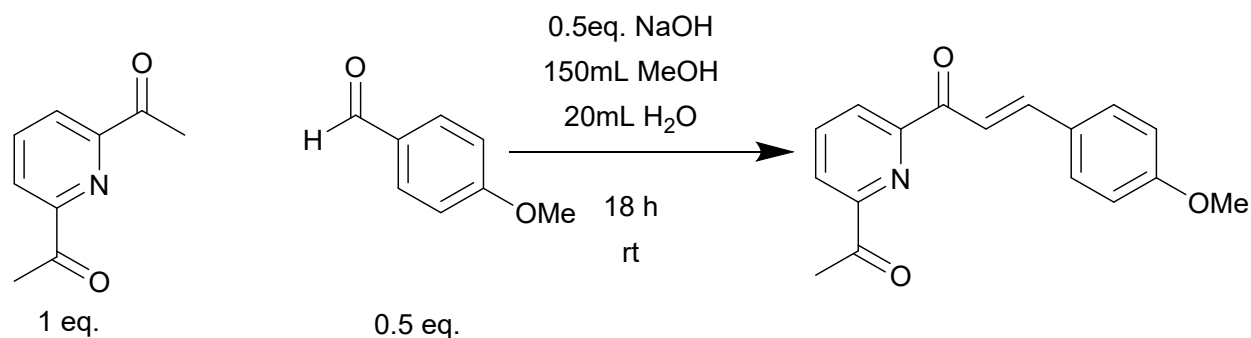

4-Methoxybenzaldehyde (0.408 g, 3 mmol) was added to a stirred solution of 2,6-Diacetylpyridine (0.978 g, 6 mmol) in 150 mL MeOH until fully dissolved. Sodium hydroxide (0.12 g, 3 mmol) dissolved in 20 mL water was added slowly over the course of 1 min and then left to stir at room temperature for 18 hours. After 18 hours the precipitate (unwanted bis-chalcone(2E,2'E)-1,1'-(pyridine-2,6-diyl)bis(3-(4-methoxyphenyl)prop-2-en-1-one)) was removed via filtration, the solvent removed under reduced pressure and the resulting solid was dissolved in 100 mL ethyl acetate and washed with 3 x 50 mL water (pH 4) washes. The ethyl acetate layer was separated, dried with magnesium sulphate and then the solvent removed under reduced pressure to afford pale yellow solid which was further dried in a drying oven at 80 °C for 24 hours. After 24 hours the required mono chalcone **3** was recrystallised from diethyl ether to afford a pale-yellow solid (0.320 g, 35%).

**M.p** 160 °C (diethyl ether)

**Vmax** (Solid)/cm<sup>-1</sup> 1698, 1594, 1255, 992 and 834;

**<sup>1</sup>H NMR** δ<sub>H</sub> (400 MHz; CDCl<sub>3</sub>) 2.90 (3 H, s, CH<sub>3</sub>), 3.90 (3H,s, OCH<sub>3</sub>), 7.00 (2 H, m, CH), 7.71 (2 H, m, CH), 8.00 (1 H, d, *J* = 16.0 Hz, CH), 8.05 (1 H, t, *J* = 7.72 Hz, CH), 8.26 (1 H, d, *J* = 16.0 Hz, CH), 8.25 (1 H, dd, *J* = 7.8 and 1.2 Hz, CH), 8.40 (1 H, dd, *J* = 7.8 and 1.2 Hz, CH);

**<sup>13</sup>C NMR** δ<sub>C</sub> (400 MHz; CDCl<sub>3</sub>) 25.8 (CH<sub>3</sub>), 55.5 (OCH<sub>3</sub>), 114.5 (CH), 118.0 (CH), 124.4 (CH), 126.1 (CH), 127.8 (Cq), 130.6 (CH), 138.1 (CH), 145.1 (CH), 152.6 (Cq), 153.6 (Cq), 162.0 (Cq), 188.5 (Cq), 199.5 (Cq);

**HRMS** *m/z* (qToF) Found 304.0959 (M+Na<sup>+</sup>). C<sub>17</sub>H<sub>16</sub>NO<sub>3</sub> requires 304.095.

<sup>1</sup>H NMR spectra consistent with:

E. C. Constable, E. Figgemeier, I. A. Hougen, C. E. Housecroft, M. Neuburger, S. Schaffner and L. A. Whall, *Dalton Trans.*, 2005, **7**, 1168.

Synthesis of 1-(6-(1-methyl-5-phenyl-4,5-dihydro-1H-pyrazol-3-yl)pyridin-2-yl)ethan-1-one (**4**)

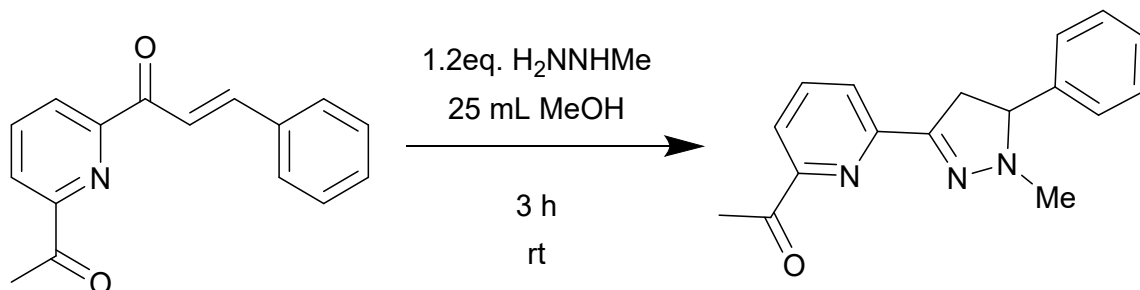

Methylhydrazine (0.6 mmol, 28 mg) was added to a stirred solution of (E)-1-(6-acetylpyridin-2-yl)-3-phenylprop-2-en-1-one (0.5 mmol, 0.126 g) in 25 mL MeOH slowly over the course of 2 min. The reaction mixture was allowed to stir for a further 3 h and then the solvent removed under reduce pressure to give a yellow oil. This was dissolved in 100 mL ethyl acetate and washed with 3 x 50 mL water (pH 4) washes, dried with magnesium sulphate and then the solvent reduced under reduced pressure to give a yellow pure which was further purified using column chromatography using silica gel and PE:EtOAc 9:1 to afford the desired **4** as a yellow oil (0.06 g, 43%).

**Vmax** (Solid)/ $\text{cm}^{-1}$  1588, 1493, 1544, 811 and 695;

**$^1\text{H}$  NMR**  $\delta_{\text{H}}$  (400 MHz;  $\text{CDCl}_3$ ) 2.69 (3 H, s,  $\text{CH}_3$ ), 2.92 (3 H, s,  $\text{CH}_3$ ), 3.13 (1 H, dd,  $J = 17.0$  and  $7.3$ , CH), 3.82 (1 H, dd,  $J = 17.1$  and  $10.5$  Hz, CH), 4.27 (1 H, dd,  $J = 14.5$  and  $7.3$  Hz, CH), 7.35 (1 H, m, CH), 7.41 (1 H, m, CH), 7.50 (1 H, m, CH), 7.81 (1 H, t,  $J = 7.8$  Hz, CH), 7.93 (1 H, dd,  $J = 7.6$  and  $1.0$  Hz, CH), 8.17 (1 H, dd,  $J = 8.0$  and  $1.0$  Hz, CH);

**$^{13}\text{C}$  NMR**  $\delta_{\text{C}}$  (400 MHz;  $\text{CDCl}_3$ ) 25.6 ( $\text{CH}_3$ ), 40.9 ( $\text{CH}_3$ ), 42.7 ( $\text{CH}_2$ ), 73.5 (CH), 120.4 (CH), 123.6 (CH), 127.4 (CH), 127.9 (CH), 128.7 (CH), 136.7 (CH), 140.3 (Cq), 150.1 (Cq), 151.6 (Cq), 152.8 (Cq) and 200.3 (Cq);

**HRMS**  $m/z$  (qToF) Found 280.1446 ( $\text{MH}^+$ ).  $\text{C}_{17}\text{H}_{18}\text{N}_3\text{O}$  requires 280.145.

Synthesis of 1-(6-(5-(4-fluorophenyl)-1-methyl-4,5-dihydro-1H-pyrazol-3-yl)pyridin-2-yl)ethan-1-one (**5**)

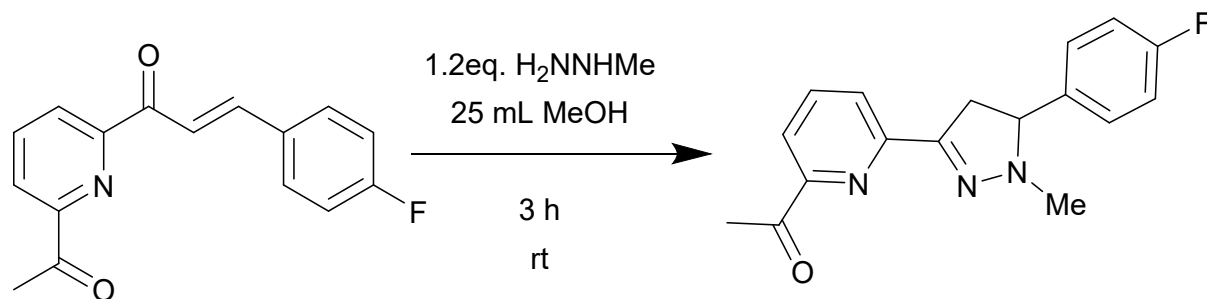

Methylhydrazine (0.6 mmol, 28 mg) was added to a stirred solution of ((E)-1-(6-acetylpyridin-2-yl)-3-(4-fluorophenyl)prop-2-en-1-one (0.5 mmol, 0.135 g) in 25 mL MeOH slowly over the course of 2 min. The reaction mixture was allowed to stir for a further 3 h and then the solvent removed under reduce pressure to give a yellow oil. This was dissolved in 100 mL ethyl acetate and washed with 3 x 50 mL water (pH 4) washes, dried with magnesium sulphate and then the solvent reduced under reduced pressure to give a yellow pure which was further purified using column chromatography using silica gel and PE:EtOAc 9:1 to afford the desired **5** as a yellow oil (0.06 g, 41%).

**Vmax** (Solid)/cm<sup>-1</sup> 1689, 1513, 1197, 945 and 883;

**<sup>1</sup>H NMR**  $\delta_{\text{H}}$  (400 MHz; CDCl<sub>3</sub>) 2.69 (3 H, s, CH<sub>3</sub>), 2.90 (3 H, s, CH<sub>3</sub>), 3.09 (1 H, dd,  $J$  = 17.1 and 14.5 Hz, CH), 3.81 (1 H, dd,  $J$  = 17.1 and 10.4 Hz, CH), 4.25 (1 H, dd,  $J$  = 14.5 and 10.4, CH), 7.10 (2 H, m, CH), 7.47 (2 H, m, CH), 7.82 (1 H, t,  $J$  = 7.8 Hz, CH), 7.94 (1 H, dd,  $J$  = 7.6 and 1.1 Hz, CH), 8.16 (1 H, dd,  $J$  = 8.0 and 1.2 Hz, CH);

**<sup>13</sup>C NMR**  $\delta_{\text{C}}$  (400 MHz; CDCl<sub>3</sub>) 25.5 (CH<sub>3</sub>), 41.0 (CH<sub>3</sub>), 42.8 (CH<sub>2</sub>), 72.8 (CH), 115.5 (CH), 115.7 (CH), 120.5 (CH), 123.6 (CH), 128.9 (CH), 135.9 (Cq), 136.7 (Cq), 150.1 (Cq), 151.5 (Cq), 152.3 (Cq), 200.2 (Cq);

**HRMS**  $m/z$  (qToF) Found 298.1356 (MH<sup>+</sup>). C<sub>17</sub>H<sub>17</sub>FN<sub>3</sub>O requires 298.1332.

Synthesis of 1-(6-(5-(4-methoxyphenyl)-1-methyl-4,5-dihydro-1H-pyrazol-3-yl)pyridin-2-yl)ethan-1-one (**6**)

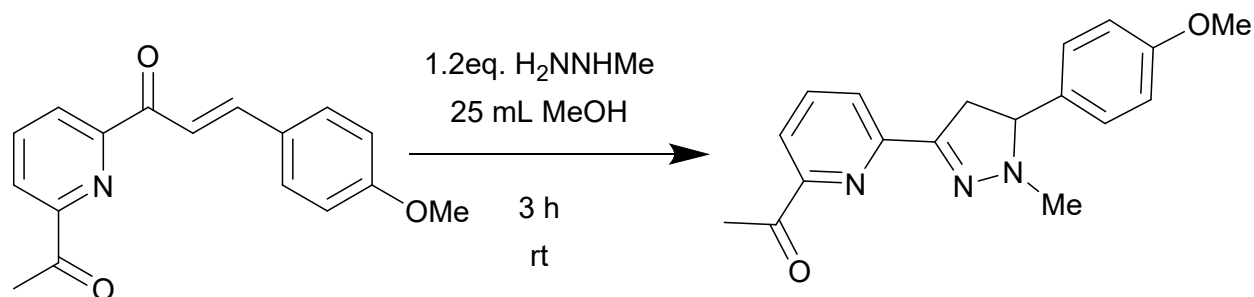

Methylhydrazine (0.38 mmol, 18 mg) was added to a stirred solution of (E)-1-(6-acetylpyridin-2-yl)-3-(4-methoxyphenyl)prop-2-en-1-one (0.32 mmol, 0.09 g) in 20 mL MeOH slowly over the course of 2 min. The reaction mixture was allowed to stir for a further 3 h and then the solvent removed under reduce pressure to give a yellow oil. This was dissolved in 100 mL ethyl acetate and washed with 3 x 50 mL water (pH 4) washes, dried with magnesium sulphate and then the solvent reduced under reduced pressure to give a yellow pure which was further purified using column chromatography using silica gel and PE:EtOAc 9:1 to afford the desired **6** as a yellow oil (0.036 g, 36%).

**V<sub>max</sub>** (Solid)/cm<sup>-1</sup> 1690, 1377, 1041 and 883;

**<sup>1</sup>H NMR** δ<sub>H</sub> (400 MHz; CDCl<sub>3</sub>) 2.61 (3 H, s, CH<sub>3</sub>), 2.80 (3 H, s, CH<sub>3</sub>), 3.01 (1 H, dd, *J* = 17.1 and 14.5 Hz, CH), 3.70 (1 H, dd, *J* = 17.1 and 10.4, CH), 3.76 (3 H, s, OCH<sub>3</sub>), 4.13 (1 H, dd, *J* = 14.5 and 10.4, CH), 6.86 (2 H, m, CH), 7.33 (2 H, m, CH), 7.72 (1 H, t, *J* = 7.8 Hz, CH), 7.84 (1 H, dd, *J* = 7.6 and 1.1 Hz, CH), 8.07 (1 H, dd, *J* = 7.9 and 1.2 Hz, CH);

**<sup>13</sup>C NMR** δ<sub>C</sub> (400 MHz; CDCl<sub>3</sub>) 25.5 (CH<sub>3</sub>), 40.9 (CH<sub>3</sub>), 42.5 (OCH<sub>3</sub>), 55.3 (CH<sub>2</sub>), 73.0 (CH), 114.1 (CH), 144.2 (CH), 120.3 (CH), 123.5 (CH), 128.6 (CH), 132.1 (Cq), 145.1 (Cq), 150.2 (Cq), 151.6 (Cq), 152.9 (Cq), 159.3 (Cq), 200.3 (Cq);

**HRMS** *m/z* (qToF) Found 310.1556 (MH<sup>+</sup>). C<sub>18</sub>H<sub>20</sub>N<sub>3</sub>O<sub>2</sub> requires 310.1523.



Synthesis of 1-(6-(1-methyl-5-phenyl-1H-pyrazol-3-yl)pyridin-2-yl)ethan-1-one (**7**)

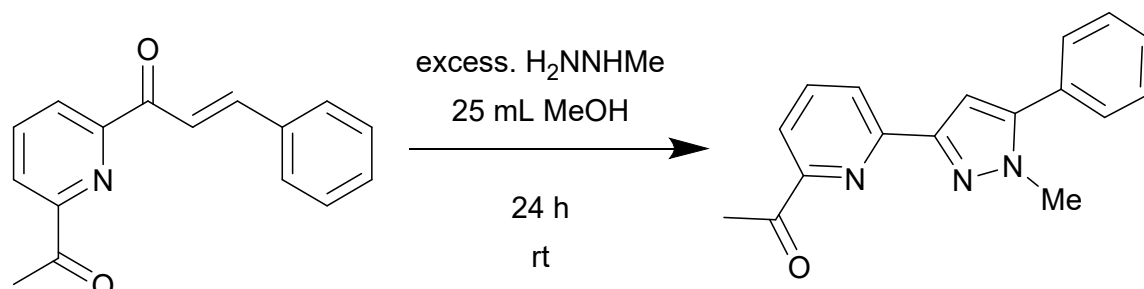

Methylhydrazine (6.4 mmol, 0.294 g) was added to a stirred solution of 1-(6-(1-methyl-5-phenyl-4,5-dihydro-1H-pyrazol-3-yl)pyridin-2-yl)ethan-1-one (0.8 mmol, 0.201 g) in 25 mL MeOH at room temperature and stirred continued for 24 hrs. After 24 h the solution was removed under reduced pressure to give a oil which was dissolved in 100 mL EtOAc and washed with 5 x 50 mL water (pH 4), the EtOAc layer separated and dried with magnesium sulphate then solvent reduced under reduced pressure to give a yellow pure which was further purified using column chromatography using silica gel and PE:EtOAc 9:1 to afford the desired **7** as a yellow oil (0.04 g, 18%).

**V<sub>max</sub>** (Solid)/ $\text{cm}^{-1}$  2930, 1700, 1170, 856 and 776;

**$^1\text{H}$  NMR**  $\delta_{\text{H}}$  (400 MHz;  $\text{CDCl}_3$ ) 2.82 (3 H, s,  $\text{CH}_3$ ), 4.00 (3 H, s,  $\text{CH}_3$ ), 7.07 (1 H, s, CH), 7.53 (5 H, m, CH), 7.88 (1 H, t,  $J = 7.8$  Hz, CH), 7.97 (2 H, dd,  $J = 7.7$  and 1.2 Hz, CH), 8.20 (1 H, dd,  $J = 7.7$  and 1.2 Hz, CH);

**$^{13}\text{C}$  NMR**  $\delta_{\text{C}}$  (400 MHz;  $\text{CDCl}_3$ ) 25.7 ( $\text{CH}_3$ ), 37.8 ( $\text{CH}_3$ ), 105.0 (CH), 120.0 (CH), 123.0 (CH), 125.1 (CH), 127.5 (CH), 128.6 (CH), 130.4 (Cq), 137.4 (CH), 145.4 (Cq), 150.3 (Cq), 151.7 (Cq), 153.2 (Cq), 200.6 (Cq);

**HRMS**  $m/z$  (qToF) Found 278.1293 ( $\text{MH}^+$ ).  $\text{C}_{17}\text{H}_{16}\text{N}_3\text{O}$  requires 278.1317.

Synthesis of 1-(6-(5-(4-fluorophenyl)-1-methyl-1H-pyrazol-3-yl)pyridin-2-yl)ethan-1-one (**8**)

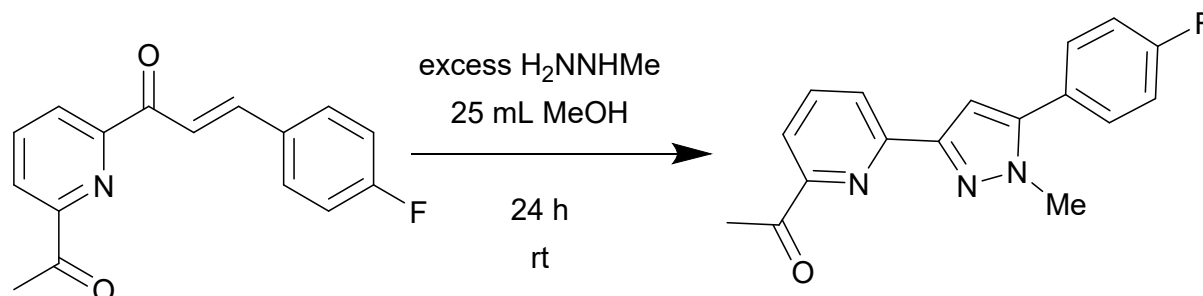

Methylhydrazine (4 mmol, 0.184 g) was added to a stirred solution of ((E)-1-(6-acetylpyridin-2-yl)-3-(4-fluorophenyl)prop-2-en-1-one (0.5 mmol, 0.135 g) in 25 mL MeOH at room temperature and stirred continued for 24 hr. After 24 h the solution was removed under reduced pressure to give a oil which was dissolved in 100 mL EtOAc and washed with 5 x 50 mL water (pH 4), the EtOAc layer separated and dried with magnesium sulphate then solvent reduced under reduced pressure to give a yellow pure which was further purified using column chromatography using silica gel and PE:EtOAc 9:1 to afford the desired **8** as a yellow oil (0.014 g, 9%).

**V<sub>max</sub>** (Solid)/ $\text{cm}^{-1}$  2919, 1689, 1586, 1220 and 805;

**$^1\text{H}$  NMR**  $\delta_{\text{H}}$  (400 MHz;  $\text{CDCl}_3$ ) 2.81 (3 H, s,  $\text{CH}_3$ ), 3.97 (3 H, s,  $\text{CH}_3$ ), 7.05 (1 H, s, CH), 7.22 (2 H, m, CH), 7.50, 2 H, m, CH), 7.89 (1 H, t,  $J = 7.8$  Hz, CH), 7.98 (1 H, dd,  $J = 7.7$  and 1.2 Hz, CH), 8.19, (1 H, dd,  $J = 7.7$  and 1.2 Hz, CH);

**$^{13}\text{C}$  NMR**  $\delta_{\text{C}}$  (400 MHz;  $\text{CDCl}_3$ ) 25.7 ( $\text{CH}_3$ ), 37.8 ( $\text{CH}_3$ ), 105.1 (CH), 115.8 (CH), 116.0 (CH), 120.2 (CH), 123.0 (CH), 130.6 (CH), 130.7 (Cq), 137.3 (Cq), 144.3 (Cq), 150.3 (Cq), 151.6 (Cq), 153.2 (Cq), 200.6 (Cq);

**HRMS**  $m/z$  (qToF) Found 296.1199 ( $\text{MH}^+$ ).  $\text{C}_{17}\text{H}_{15}\text{FN}_3\text{O}$  requires 296.1195.

Synthesis of 1-(6-(5-(4-methoxyphenyl)-1-methyl-1H-pyrazol-3-yl)pyridin-2-yl)ethan-1-one (**9**)

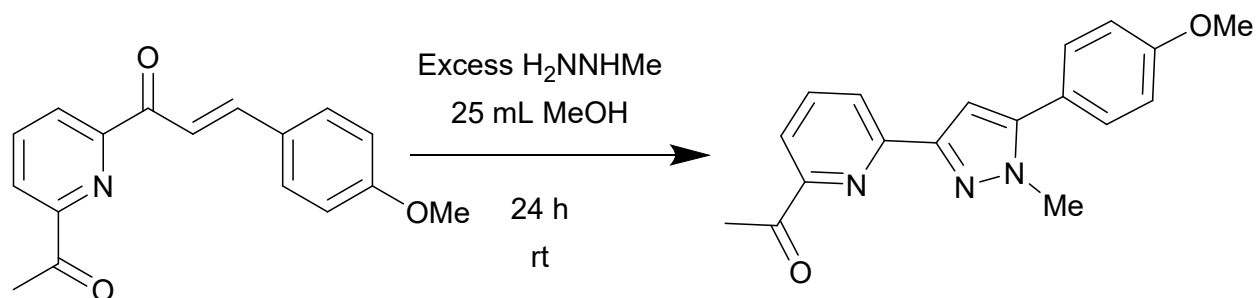

Methylhydrazine (4 mmol, 0.184 g) was added to a stirred solution of (E)-1-(6-acetylpyridin-2-yl)-3-(4-methoxyphenyl)prop-2-en-1-one (0.5 mmol, 0.135 g) in 25 mL MeOH at room temperature and stirred continued for 24 h. After 24 h the solution was removed under reduced pressure to give an oil which was dissolved in 100 mL EtOAc and washed with 5 x 50 mL water (pH 4), the EtOAc layer separated and dried with magnesium sulphate then solvent reduced under reduced pressure to give a yellow pure which was further purified using column chromatography using silica gel and PE:EtOAc 9:1 to afford the desired **9** as a yellow oil (0.013 g, 8%).

**Vmax** (Solid)/ $\text{cm}^{-1}$  2973, 1690, 1377, 1046 and 880;

**$^1\text{H}$  NMR**  $\delta_{\text{H}}$  (400 MHz;  $\text{CDCl}_3$ ) 2.71 (3 H, s,  $\text{CH}_3$ ), 3.79 (3 H, s,  $\text{CH}_3$ ), 4.30 (3 H, s,  $\text{OCH}_3$ ), 6.82 (1 H, s, CH), 6.89 (2 H, m, CH), 7.70 (2 H, m, CH), 7.77 (2 H, dd,  $J = 7.8$  and 1.2 Hz, CH), 7.85 (1 H, t,  $J = 7.8$  Hz, CH), 7.93 (1 H, dd,  $J = 7.7$  and 1.2 Hz, CH);

**$^{13}\text{C}$  NMR**  $\delta_{\text{C}}$  (400 MHz;  $\text{CDCl}_3$ ) 26.1 ( $\text{CH}_3$ ), 40.0 ( $\text{CH}_3$ ), 55.3 ( $\text{OCH}_3$ ), 103.4 (CH), 109.2 (CH), 109.5 (CH), 114.1 (CH), 120.1 (CH), 125.8 (CH), 126.8 (Cq), 131.4 (Cq), 132.3 (Cq), 137.8 (Cq), 150.6 (Cq), 158.1 (Cq), 199.6 (Cq);

**HRMS**  $m/z$  (qToF) Found 308.1399 ( $\text{MH}^+$ ).  $\text{C}_{18}\text{H}_{18}\text{N}_3\text{O}_2$  requires 308.1381.

# NMR Spectra (S3)

## (E)-1-(6-acetylpyridin-2-yl)-3-phenylprop-2-en-1-one – Chalcone (1)

4-H Chalcone  
PROTON16.CMDnp CDCl<sub>3</sub> (C:\Bruker\TopSpin3.6.5) nmrsu 90

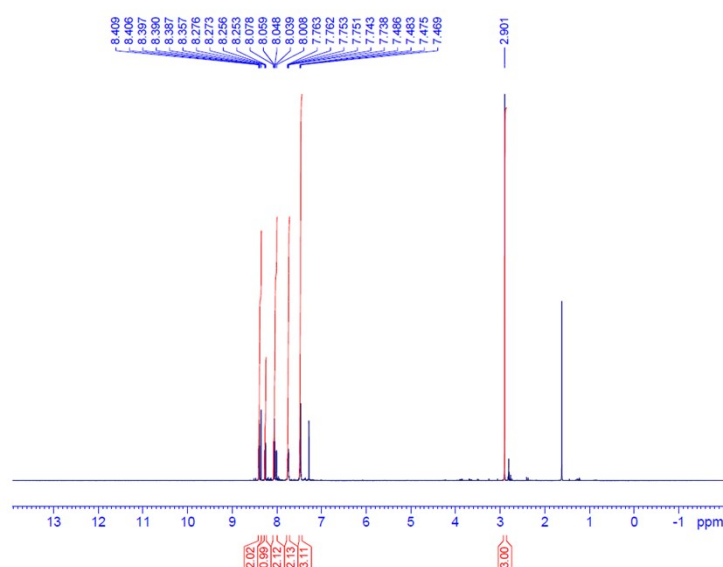

<sup>1</sup>H NMR, CDCl<sub>3</sub>, 400 MHz.

4-H Chalcone  
C13CPD1024.CMDnp CDCl<sub>3</sub> (C:\Bruker\TopSpin3.6.5) nmrsu 90

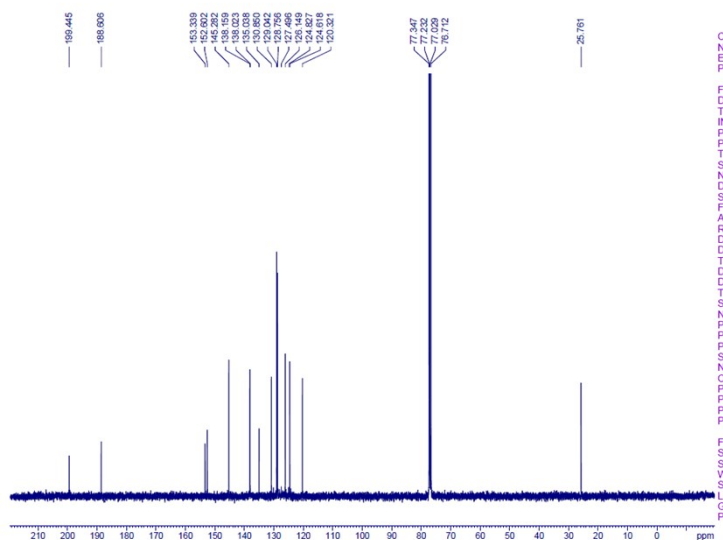

$^{13}\text{C}$  NMR,  $\text{CDCl}_3$ , 400 MHz.

(E)-1-(6-acetylpyridin-2-yl)-3-(4-fluorophenyl)prop-2-en-1-one – Chalcone (2)

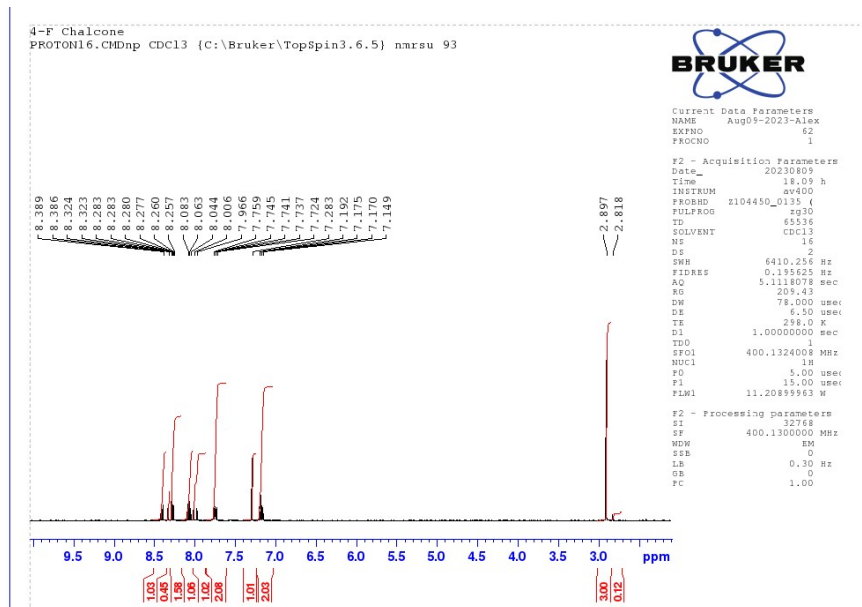

$^1\text{H}$  NMR,  $\text{CDCl}_3$ , 400 MHz.

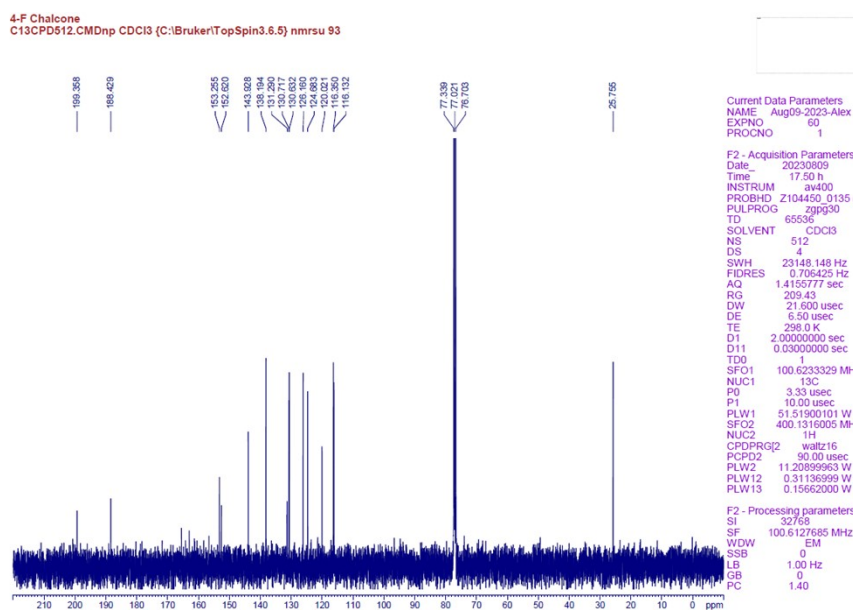

$^{13}\text{C}$  NMR,  $\text{CDCl}_3$ , 400 MHz.

**(E)-1-(6-acetylpyridin-2-yl)-3-(4-methoxyphenyl)prop-2-en-1-one – Chalcone (3)**

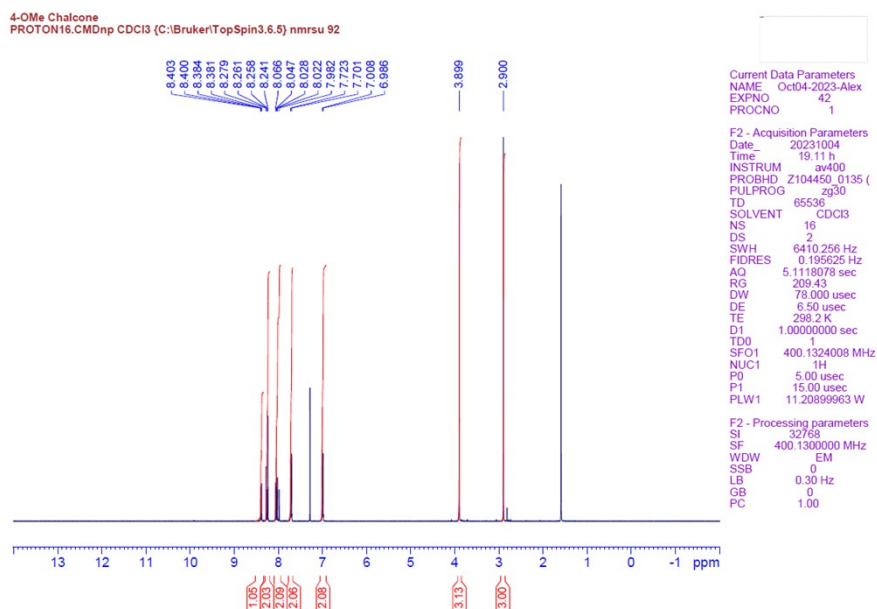

<sup>1</sup>H NMR, CDCl<sub>3</sub>, 400 MHz.

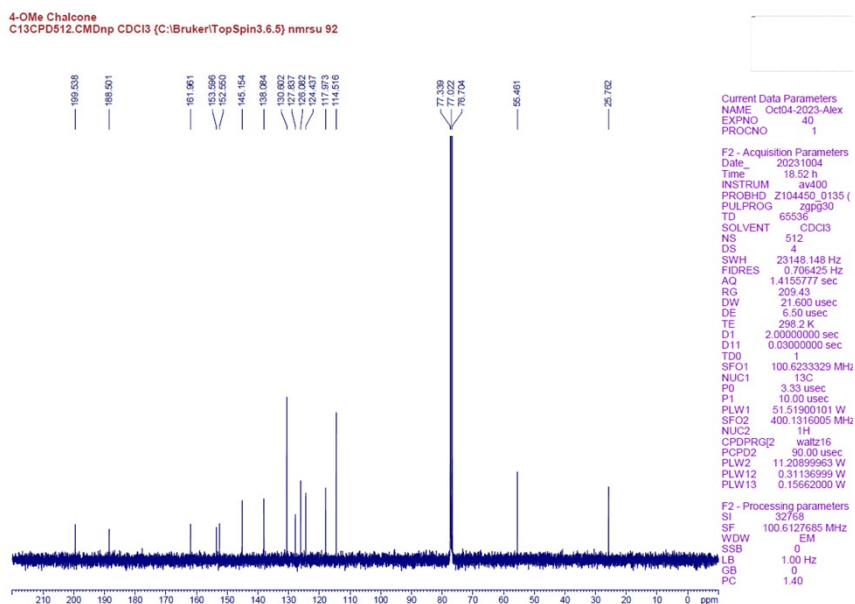

<sup>13</sup>C NMR, CDCl<sub>3</sub>, 400 MHz.

# 1-(6-(1-methyl-5-phenyl-4,5-dihydro-1H-pyrazol-3-yl)pyridin-2-yl)ethan-1-one – Pyrazoline (4)

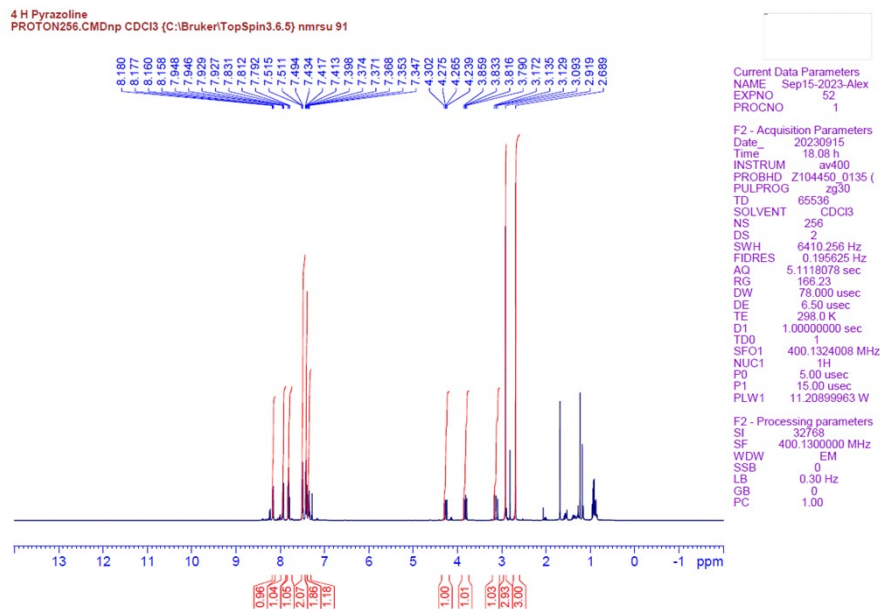

<sup>1</sup>H NMR, CDCl<sub>3</sub>, 400 MHz.

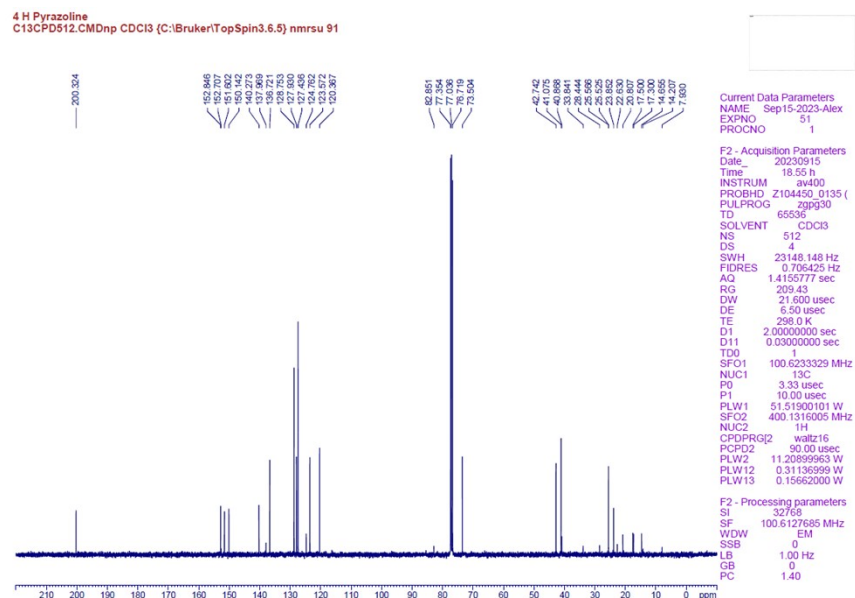

<sup>13</sup>C NMR, CDCl<sub>3</sub>, 400 MHz.

#### 4-H Pyrazoline + 2 eq. Zn<sup>2+</sup>

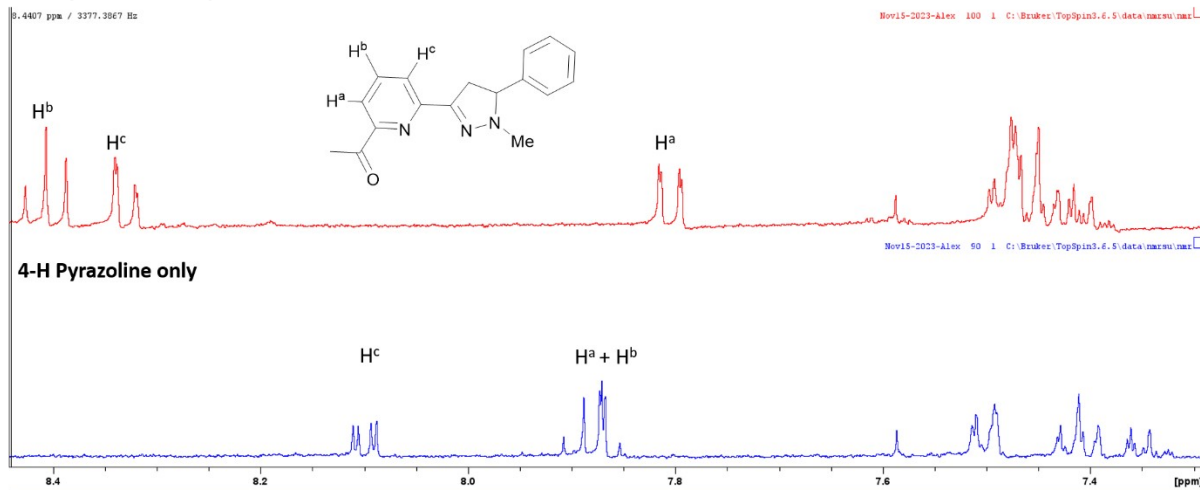

<sup>1</sup>H NMR with and without Zn<sup>2</sup>, MeCN-d<sub>3</sub>, 400 MHz.

#### 1-(6-(5-(4-fluorophenyl)-1-methyl-4,5-dihydro-1H-pyrazol-3-yl)pyridin-2-yl)ethan-1-one – Pyrazoline (5)

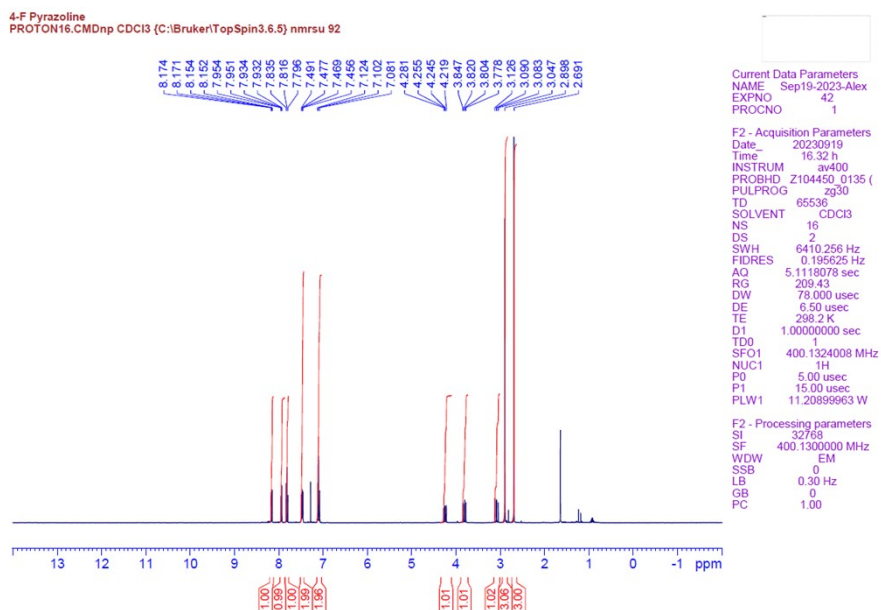

<sup>1</sup>H NMR, CDCl<sub>3</sub>, 400 MHz.



4-F Pyrazoline  
C13CPD1024.CMDnp CDCl3 (C:\Bruker\TopSpin3.6.5) nmrsu 92

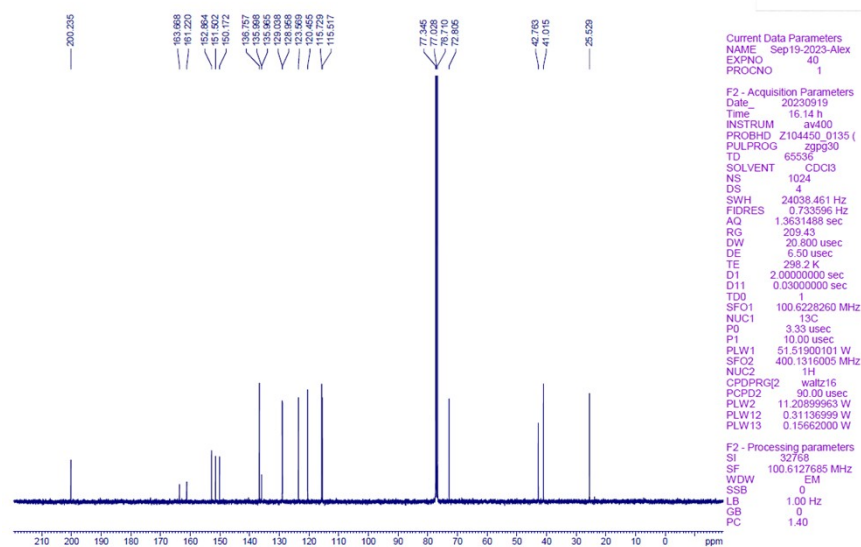

$^{13}\text{C}$  NMR,  $\text{CDCl}_3$ , 400 MHz.

4-F Pyrazoline + 2 eq.  $\text{Zn}^{2+}$

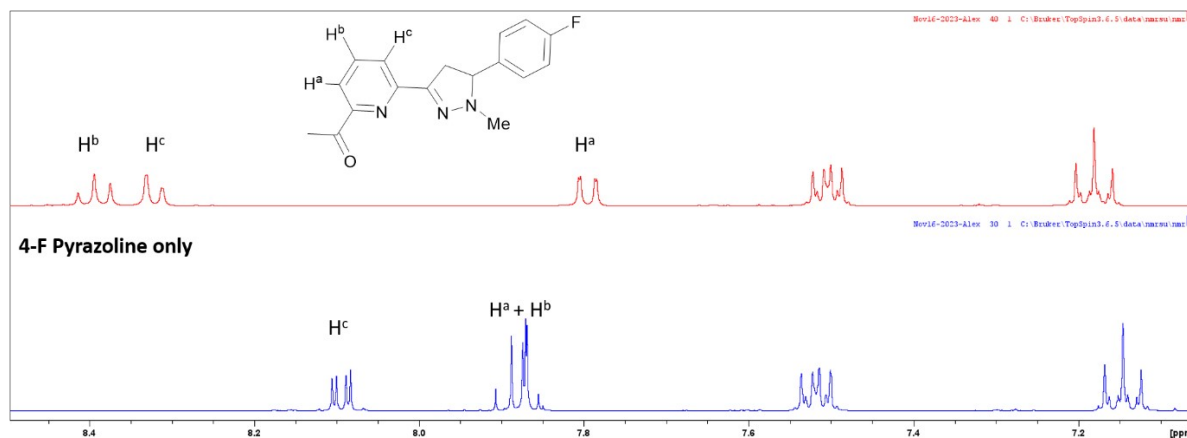

$^1\text{H}$  NMR with and without  $\text{Zn}^{2+}$ ,  $\text{MeCN-d}_3$ , 400 MHz.

# 1-(6-(5-(4-methoxyphenyl)-1-methyl-4,5-dihydro-1H-pyrazol-3-yl)pyridin-2-yl)ethan-1-one – Pyrazoline (6)

4-OMe Pyrazoline  
PROTON256.CMDnp CDCl<sub>3</sub> (C:\Bruker\TopSpin3.6.5) nmrsu 89

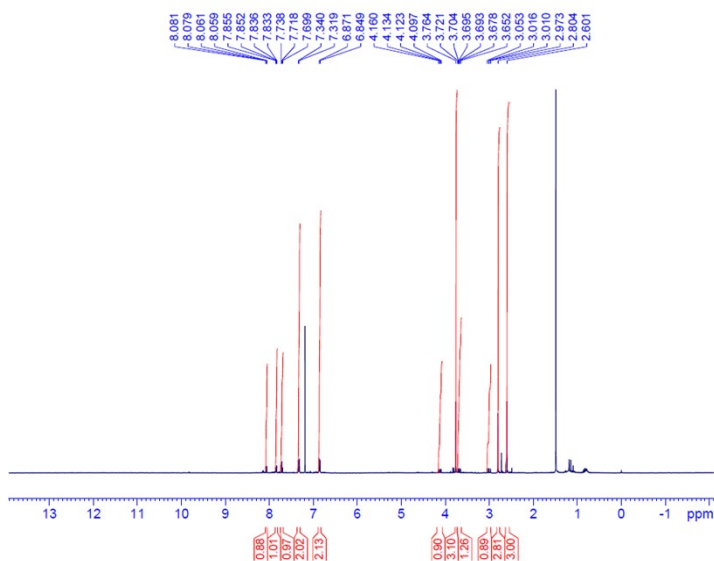

Current Data Parameters  
NAME Oct18-2023-Alex  
EXPNO 40  
PROCNO 1

F2 - Acquisition Parameters  
Date\_ 20231018  
Time 16.16 h  
INSTRUM av400  
PROBHD Z104450\_0135 (Z  
PULPROG zg30  
TD 65536  
SOLVENT CDCl<sub>3</sub>  
NS 256  
DS 2  
SWH 6410.256 Hz  
FIDRES 0.185625 Hz  
AQ 5.1118078 sec  
RG 209.43  
DW 78.000 usec  
DE 6.50 usec  
TE 298.0 K  
D1 1.00000000 sec  
TD0 1  
SFO1 400.1324008 MHz  
NUC1 1H  
P0 5.00 usec  
P1 15.00 usec  
PLW1 11.20899963 W

F2 - Processing parameters  
SI 32768  
SF 400.1300367 MHz  
WDW EM  
SSB 0  
LB 0.30 Hz  
GB 0  
PC 1.00

<sup>1</sup>H NMR, CDCl<sub>3</sub>, 400 MHz.

4-OMe Pyrazoline  
C13CPD1024.CMDnp CDCl<sub>3</sub> (C:\Bruker\TopSpin3.6.5) nmrsu 85

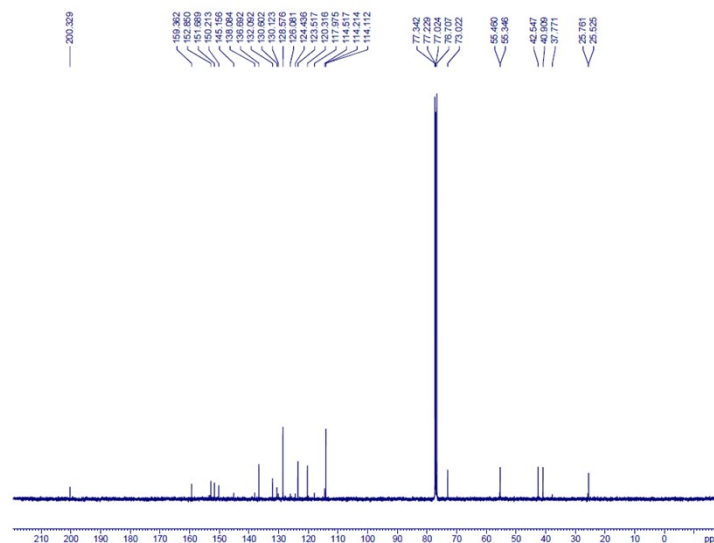

Current Data Parameters  
NAME Nov21-2023-Alex  
EXPNO 10  
PROCNO 1

F2 - Acquisition Parameters  
Date\_ 20231121  
Time 10.51 h  
INSTRUM av400  
PROBHD Z104450\_0135 (Z  
PULPROG zgpg30  
TD 65536  
SOLVENT CDCl<sub>3</sub>  
NS 1024  
DS 4  
SWH 24038.461 Hz  
FIDRES 0.733596 Hz  
AQ 1.3631488 sec  
RG 209.43  
DW 20.800 usec  
DE 6.50 usec  
TE 298.2 K  
D1 2.00000000 sec  
D11 0.03000000 sec  
TD0 1  
SFO1 100.6228260 MHz  
NUC1 13C  
P0 3.33 usec  
P1 10.00 usec  
PLW1 51.51900101 W  
SFO2 400.1316005 MHz  
NUC2 1H  
CPDPRG2 waltz16  
PCPD2 90.00 usec  
PLW2 11.20899963 W  
PLW12 0.31136999 W  
PLW13 0.15662000 W

F2 - Processing parameters  
SI 32768  
SF 100.6127685 MHz  
WDW EM  
SSB 0  
LB 1.00 Hz  
GB 0  
PC 1.40

<sup>13</sup>C NMR, CDCl<sub>3</sub>, 400 MHz.

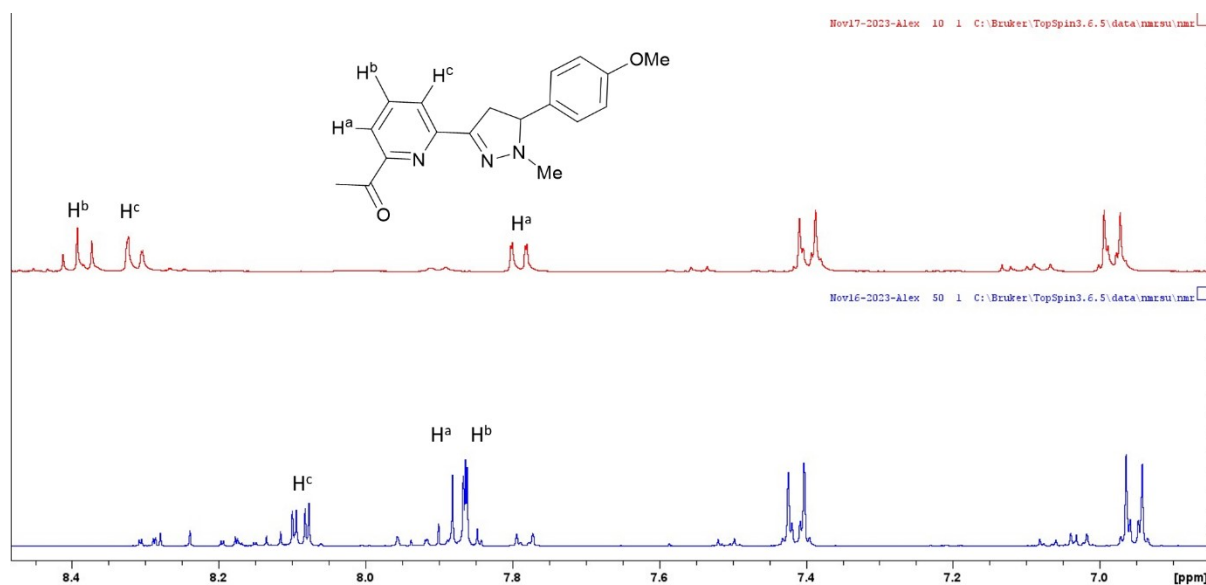

<sup>1</sup>H NMR with and without Zn<sup>2+</sup>, MeCN-d<sub>3</sub>, 400 MHz.

### 1-(6-(1-methyl-5-phenyl-1H-pyrazol-3-yl)pyridin-2-yl)ethan-1-one – Pyrazole (7)

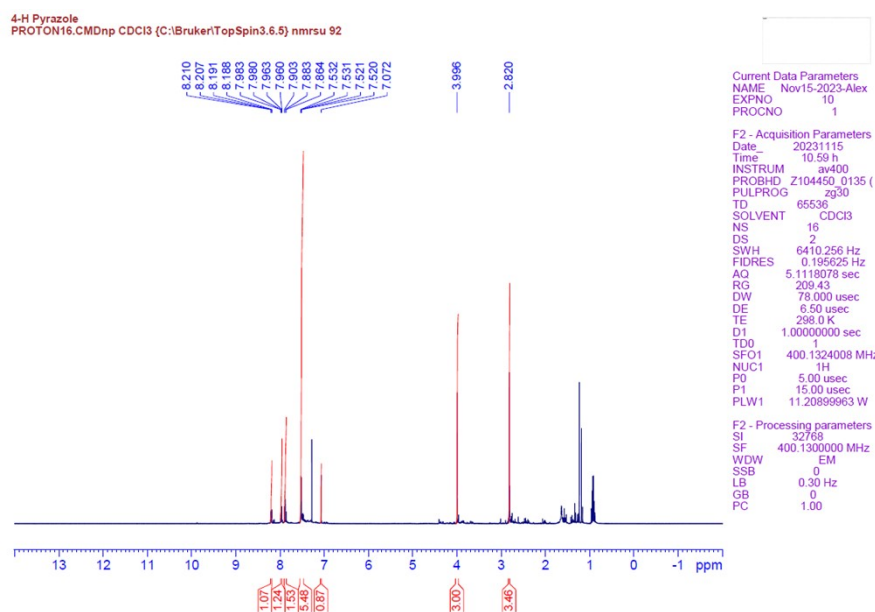

<sup>1</sup>H NMR, CDCl<sub>3</sub>, 400 MHz.

4-H Pyrazole  
C13CPD1024.CMDnp CDCl3 {C:\Bruker\TopSpin3.6.5} nmrsu 92

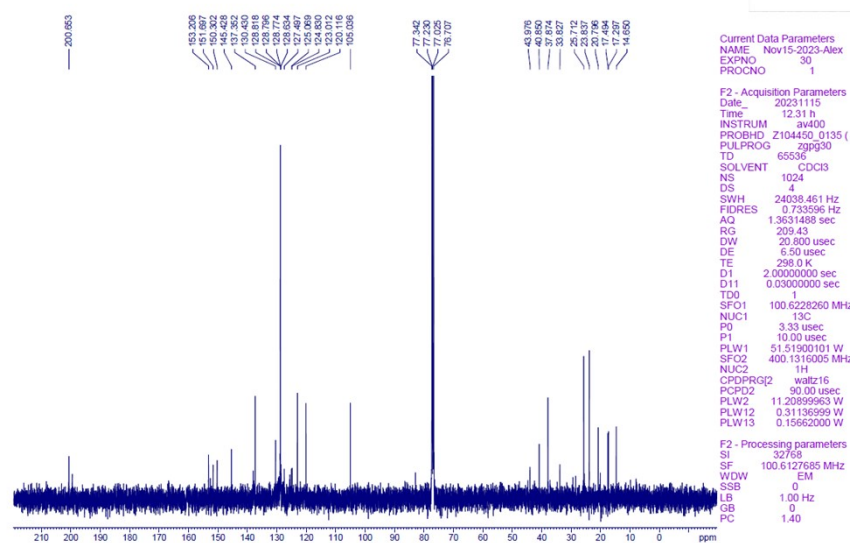

$^{13}\text{C}$  NMR, , CDCl<sub>3</sub>, 400 MHz.

4-H Pyrazole + 2 eq. Zn<sup>2+</sup>

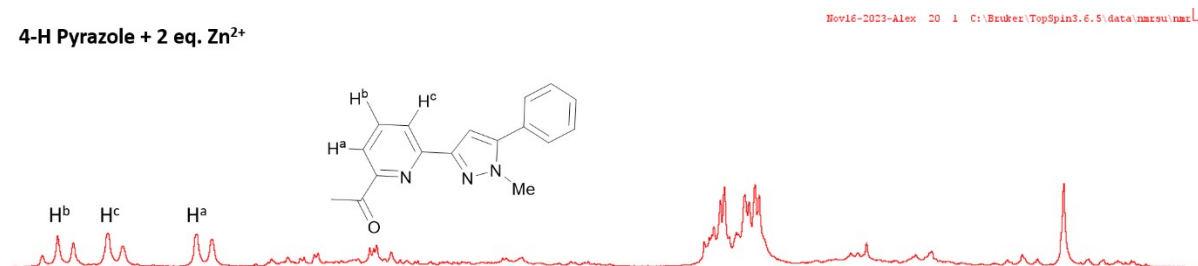

4-H Pyrazole only

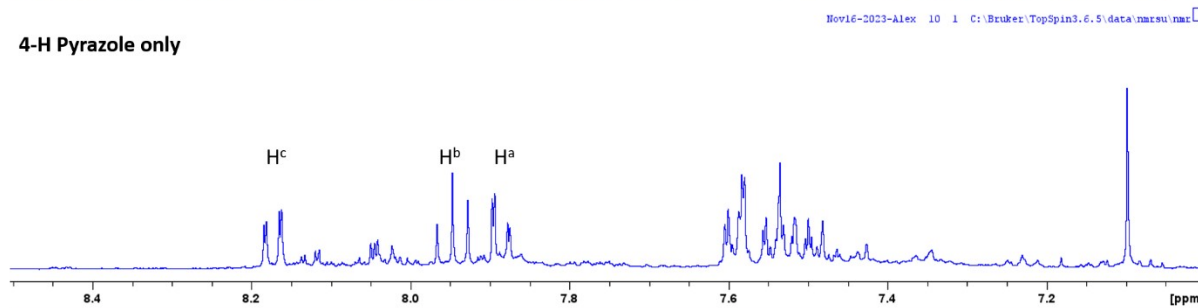

$^1\text{H}$  NMR with and without Zn<sup>2+</sup>, MeCN-d<sub>3</sub>, 400 MHz.

# 1-(6-(5-(4-fluorophenyl)-1-methyl-1H-pyrazol-3-yl)pyridin-2-yl)ethan-1-one – Pyrazole (8)

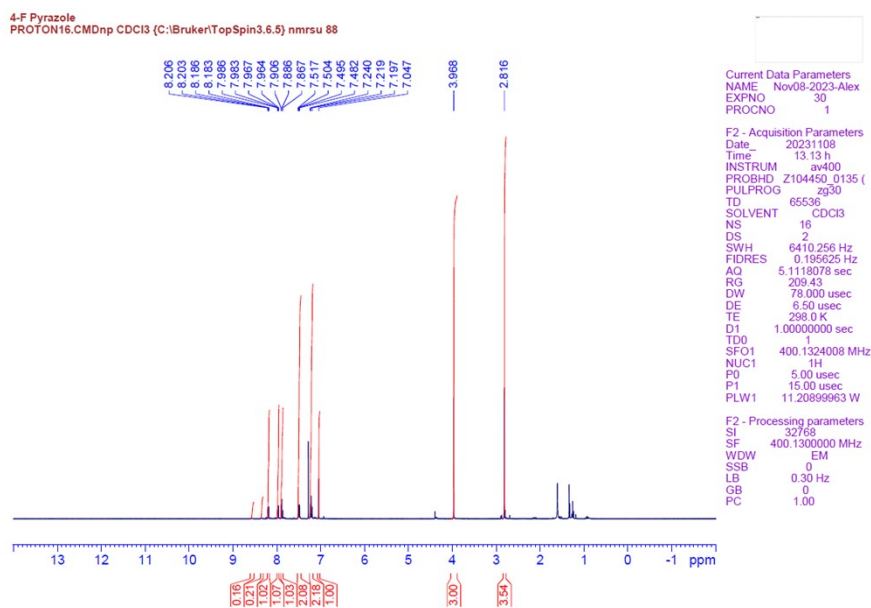

<sup>1</sup>H NMR, , CDCl<sub>3</sub>, 400 MHz.

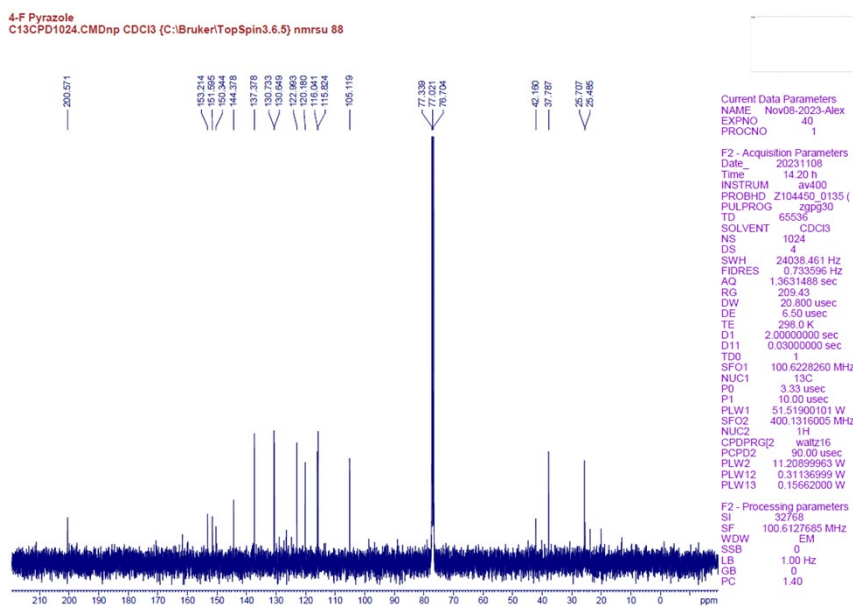

<sup>13</sup>C NMR, , CDCl<sub>3</sub>, 400 MHz.

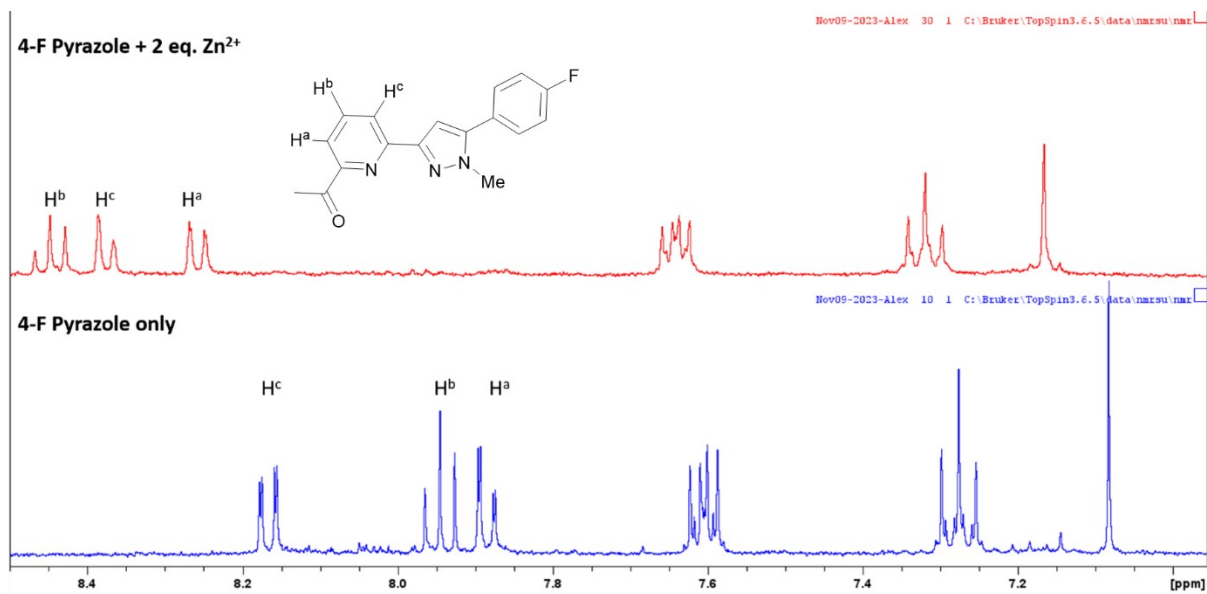

<sup>1</sup>H NMR with and without Zn<sup>2+</sup>, MeCN-d<sub>3</sub>, 400 MHz.

### 1-(6-(5-(4-methoxyphenyl)-1-methyl-1H-pyrazol-3-yl)pyridin-2-yl)ethan-1-one – Pyrazole (9)

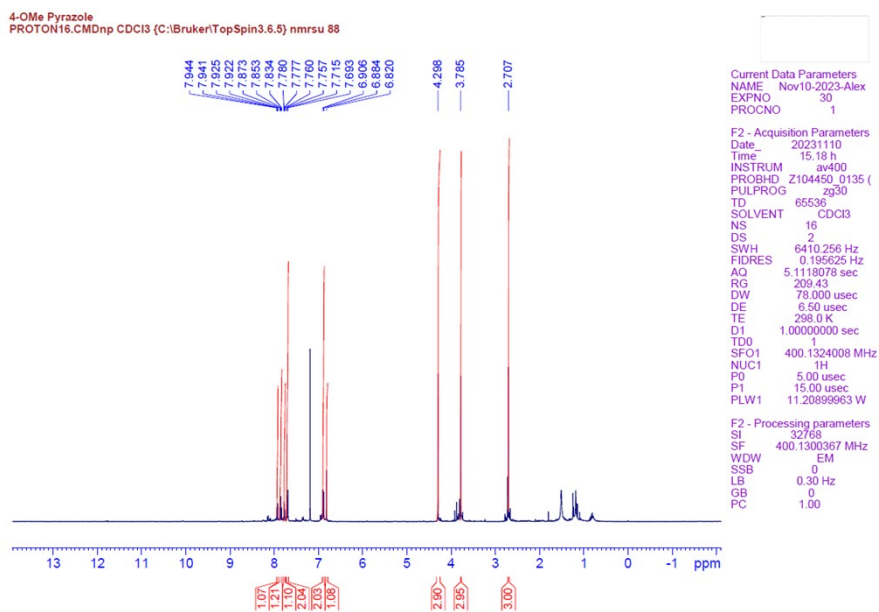

<sup>1</sup>H NMR, CDCl<sub>3</sub>, 400 MHz.

**Me Pyrazole 13C NMR**  
**C13CPD512.CMDnp CDCl3 {C:\Bruker\TopSpin3.6.5} nmrsu 89**

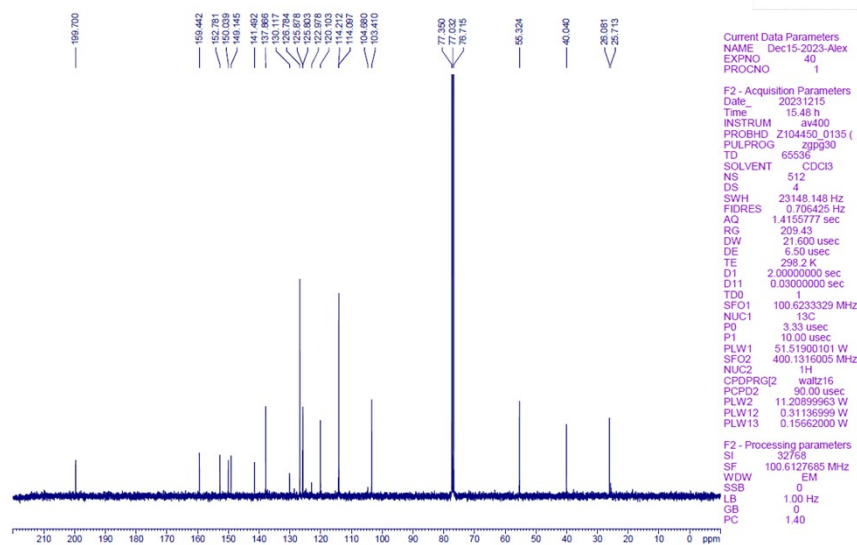

<sup>13</sup>C NMR, CDCl<sub>3</sub>, 400 MHz.

#### 4-H Bis Chalcone

**4-H Bis-Chalcone**  
**PROTON16.CMDnp CDCl3 {C:\Bruker\TopSpin3.6.5} nmrsu 40**

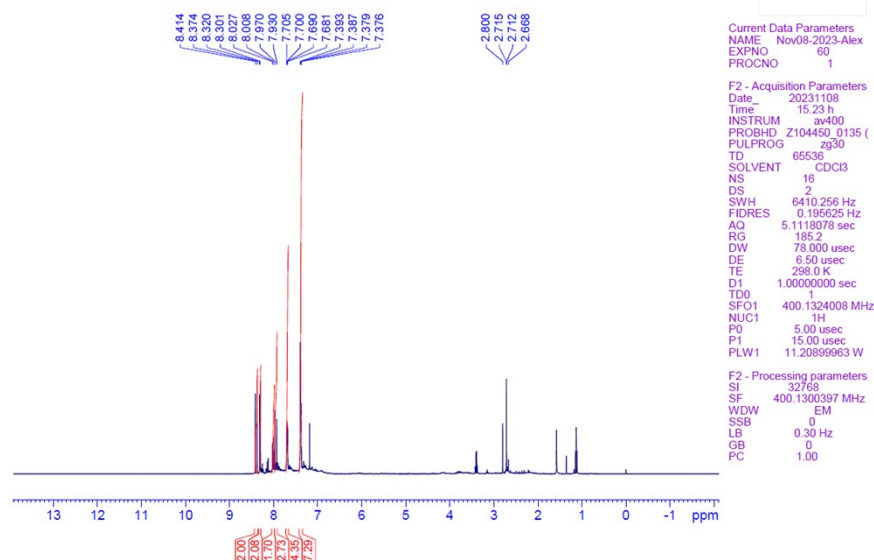

<sup>1</sup>H NMR, CDCl<sub>3</sub>, 400 MHz.

## 4-OMe Bis-chalcone

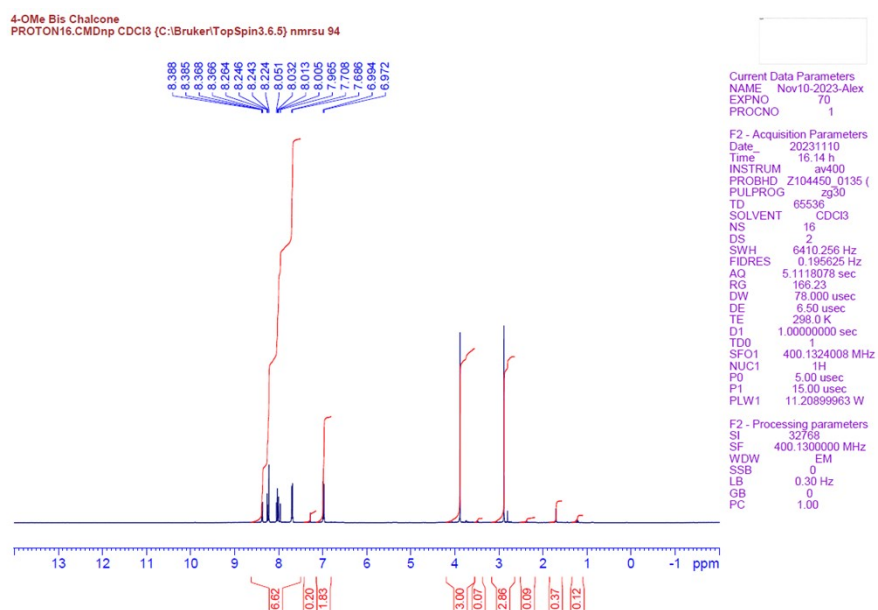

<sup>1</sup>H NMR, CDCl<sub>3</sub>, 400 MHz.

Data is consistent with previous bis-chalcones in the literature;

- (a) E. C. Constable, E. Figgemeier, I. A. Hougen, C. E. Housecroft, M. Neuburger, S. Schaffner and L. A. Whall, *Dalton Trans.*, 2005, **7**, 1168;
- (b) L. Sansalone, E.A. Veliz, N. G. Myrthil, V. Stathias, W. Walters, I. I. Torrens, S. C. Schürer, S. Vanni, R. M. Leblanc, R. M. Graham, *Cancers*, 2019, **11**, 357.



# Absorbance Spectra and Extinction Coefficients (S4)

## Pyrazoline (4)

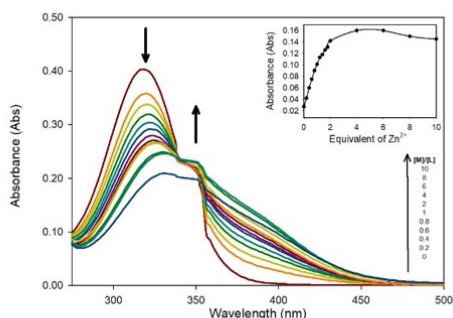

(4) only, Abs @ 320 nm = 0.331,  $\epsilon = 16550 \text{ M}^{-1} \text{ cm}^{-1}$

(4) + 6 eq.  $\text{Zn}^{2+}$ , Abs @336 nm =0.210,  $\epsilon = 10500 \text{ M}^{-1} \text{ cm}^{-1}$

## Pyrazoline (5)

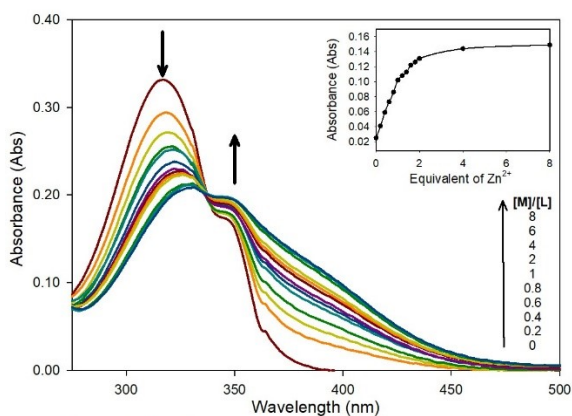

(5) only, Abs @ 320 nm = 0.403,  $\epsilon = 20150 \text{ M}^{-1} \text{ cm}^{-1}$

(5) + 6 eq.  $\text{Zn}^{2+}$ , Abs @336 nm =0.245,  $\epsilon = 12250 \text{ M}^{-1} \text{ cm}^{-1}$

## Pyrazoline (6)

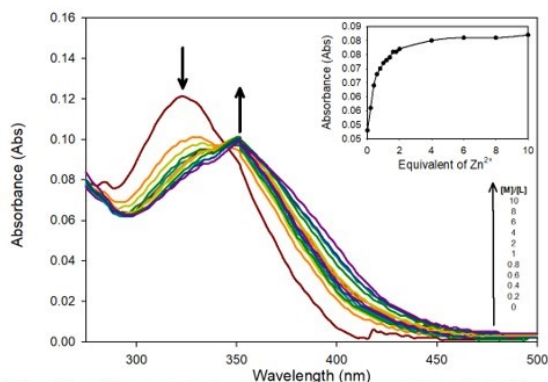

(6) only, Abs @ 320 nm = 0.12,  $\epsilon = 6000 \text{ M}^{-1} \text{ cm}^{-1}$

(6) + 6 eq.  $\text{Zn}^{2+}$ , Abs @336 nm =0.113,  $\epsilon = 5650 \text{ M}^{-1} \text{ cm}^{-1}$

### Pyrazole (7)

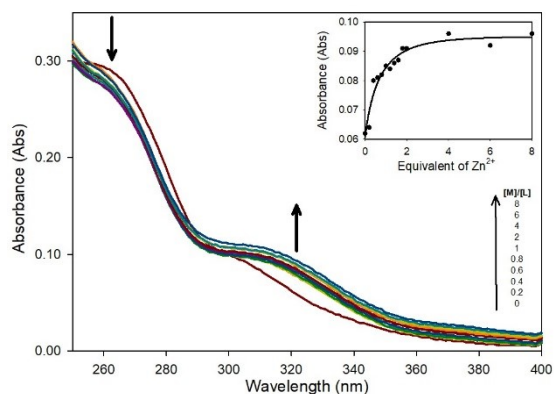

(7) Only, Abs @ 270 nm = 0.26 ,  $\epsilon = 13,000 \text{ M}^{-1} \text{ cm}^{-1}$

(7) + 6 eq. Zn<sup>2+</sup> Abs @ 320nm = 0.091,  $\epsilon = 4,550 \text{ M}^{-1} \text{ cm}^{-1}$

### Pyrazole (8)

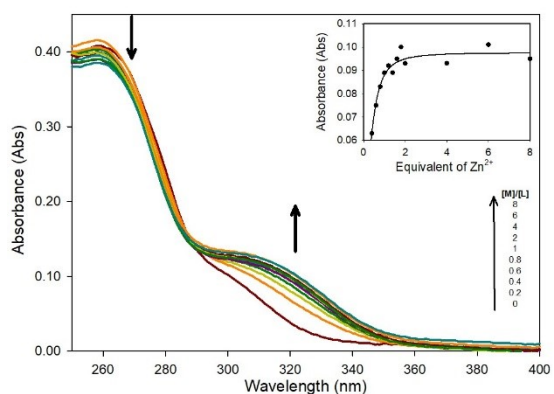

(8) Only, Abs @ 270 nm = 0.358 ,  $\epsilon = 17,900 \text{ M}^{-1} \text{ cm}^{-1}$

(8) + 6 eq. Zn<sup>2+</sup> Abs @ 320nm = 0.106 ,  $\epsilon = 5,300 \text{ M}^{-1} \text{ cm}^{-1}$

### Pyrazole (9)

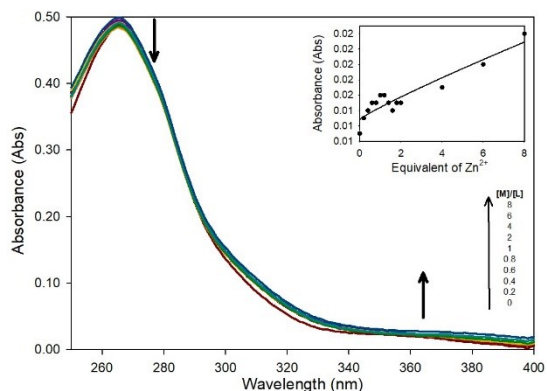

(9) Only, Abs @ 270 nm = 0.074 ,  $\epsilon = 3,700 \text{ M}^{-1} \text{ cm}^{-1}$

(9) + 6 eq. Zn<sup>2+</sup> Abs @ 370nm = 0.082 ,  $\epsilon = 4,100 \text{ M}^{-1} \text{ cm}^{-1}$

## Job Plot Analysis (S5)

**Pyrazoline (4), [4] + [Zn<sup>2+</sup>] = 100  $\mu$ M, MeCN**

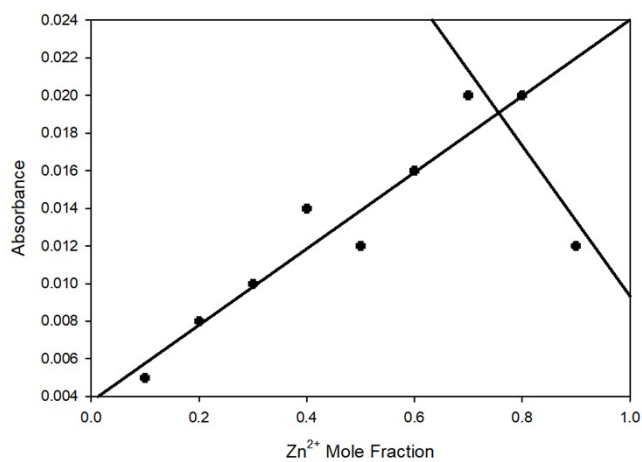

**Pyrazoline (5), [5] + [Zn<sup>2+</sup>] = 100  $\mu$ M, MeCN**

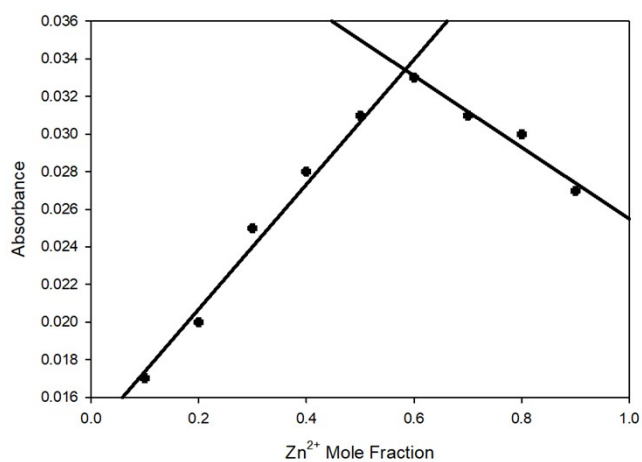

**Pyrazoline (6), [6] + [Zn<sup>2+</sup>] = 100  $\mu$ M, MeCN**

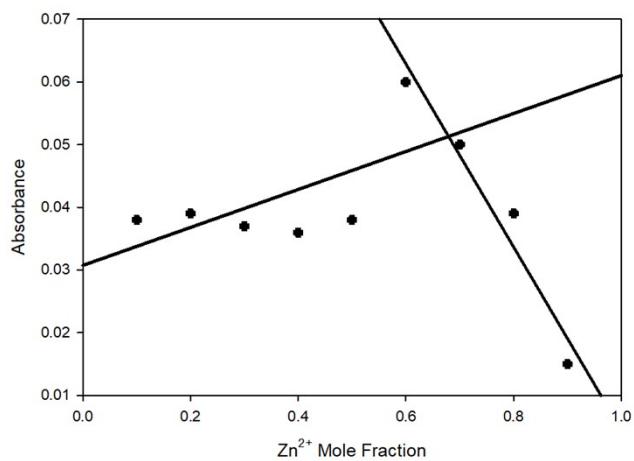

**Pyrazole (7), [7] + [Zn<sup>2+</sup>] = 100  $\mu$ M, MeCN**

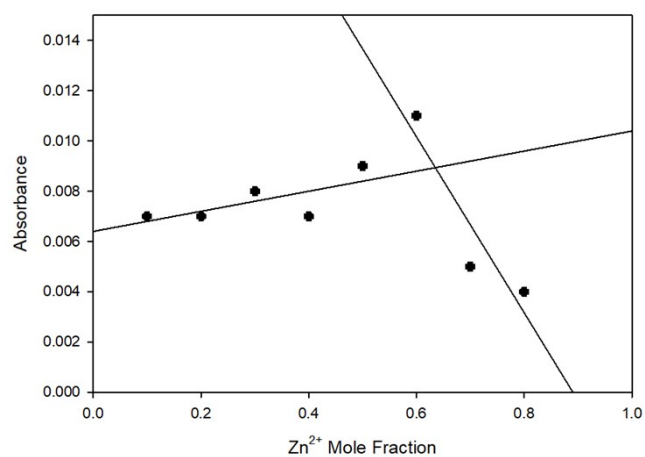

**Pyrazole (8), [8] + [Zn<sup>2+</sup>] = 100  $\mu$ M, MeCN**

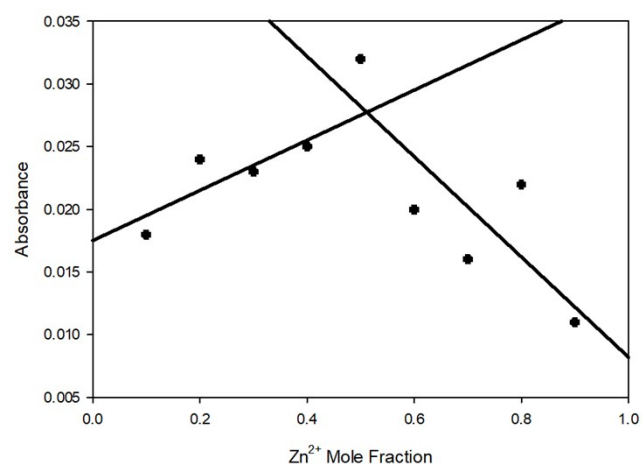

**Pyrazole (9), [9] + [Fe<sup>3+</sup>] = 100  $\mu$ M, MeCN**

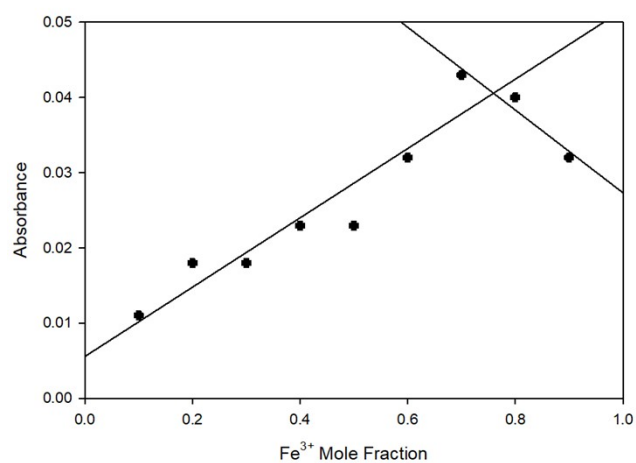

## Fluorescence Spectra (S6)

Pyrazoline (4) Metal Screen,  $\lambda_{\text{ex}}$  370 nm, 20  $\mu\text{M}$  4, 100  $\mu\text{M}$  metal, MeCN

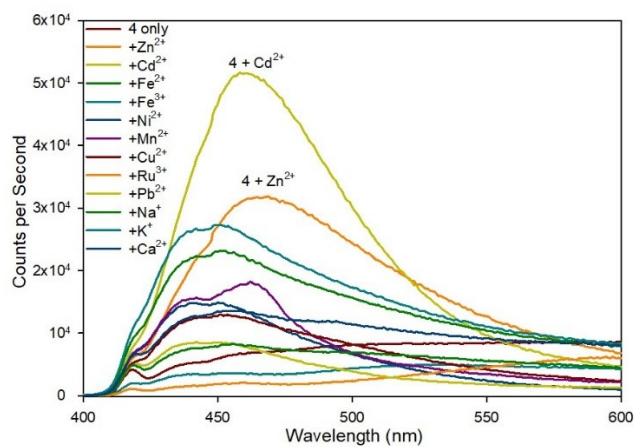

Pyrazoline (5) Metal Screen,  $\lambda_{\text{ex}}$  370 nm, 20  $\mu\text{M}$  5, 100  $\mu\text{M}$  metal, MeCN

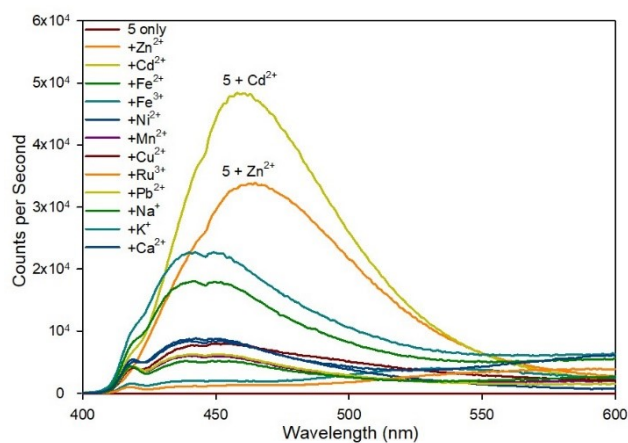

Pyrazoline (6) Metal Screen,  $\lambda_{\text{ex}}$  370 nm, 20  $\mu\text{M}$  6, 100  $\mu\text{M}$  metal, MeCN

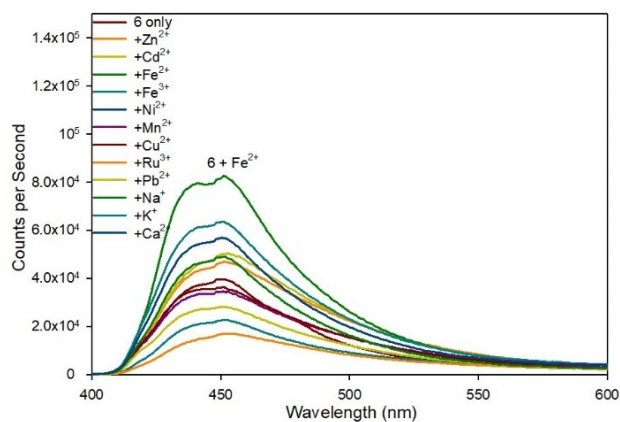

**Pyrazole (7) Metal Screen,  $\lambda_{ex}$ 290 nm, 20  $\mu$ M 7, 100  $\mu$ M metal, MeCN**

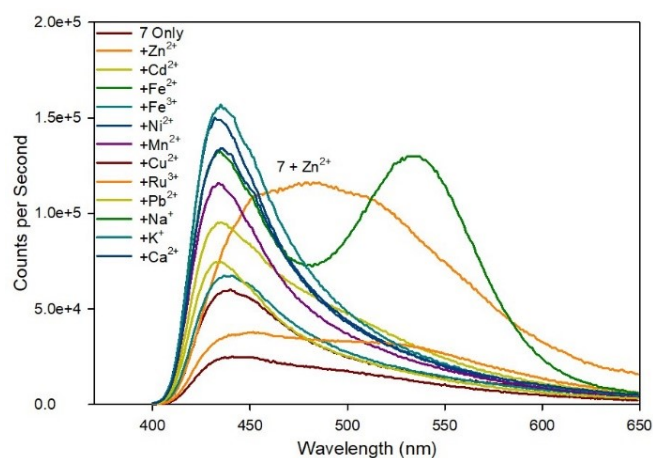

**Pyrazole (8) Metal Screen,  $\lambda_{ex}$ 290 nm, 20  $\mu$ M 8, 100  $\mu$ M metal, MeCN**

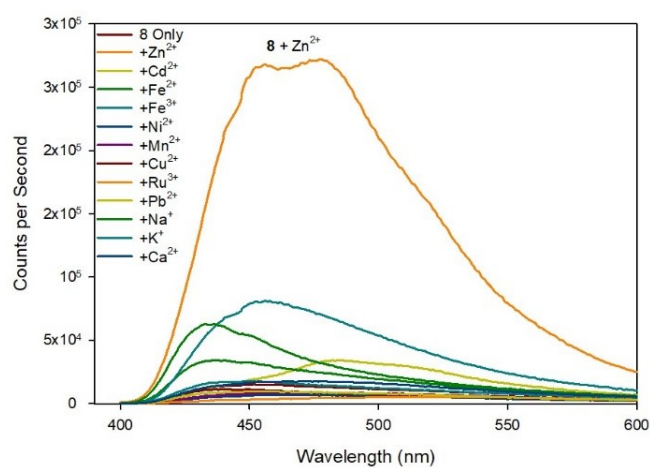

**Pyrazole (9) Metal Screen,  $\lambda_{ex}$ 290 nm, 20  $\mu$ M 9, 100  $\mu$ M metal, MeCN**

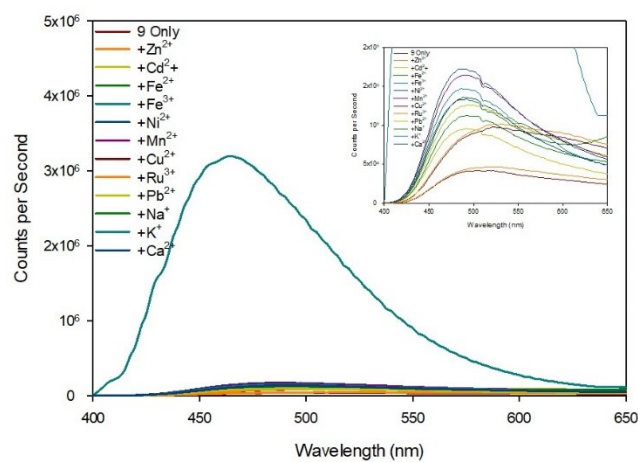

**Pyrazoline (4) 20  $\mu\text{M}$  +  $\text{Zn}^{2+}$  Titration,  $\lambda_{\text{ex}}$  370 nm,  $\lambda_{\text{em}}$  480 nm**

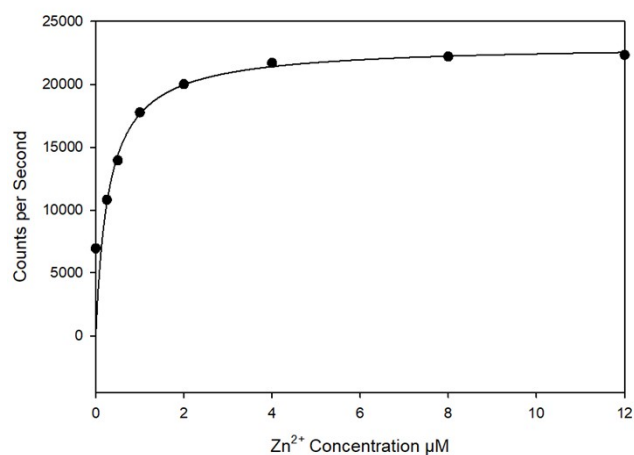

**Pyrazoline (5) 20  $\mu\text{M}$  +  $\text{Zn}^{2+}$  Titration,  $\lambda_{\text{ex}}$  370 nm,  $\lambda_{\text{em}}$  480 nm**

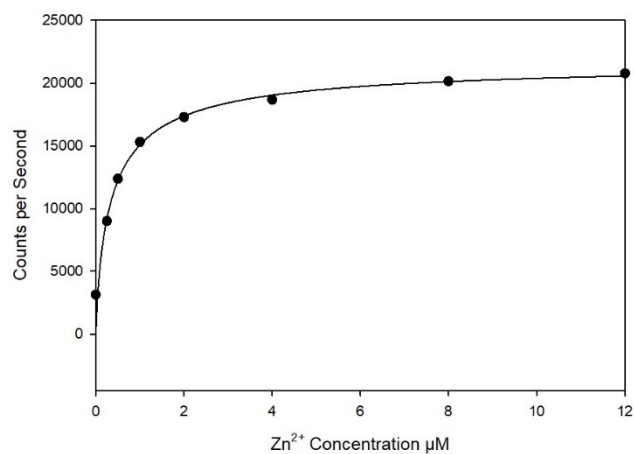

**Pyrazoline (6) 20  $\mu\text{M}$  +  $\text{Zn}^{2+}$  Titration,  $\lambda_{\text{ex}}$  370 nm,  $\lambda_{\text{em}}$  480 nm**

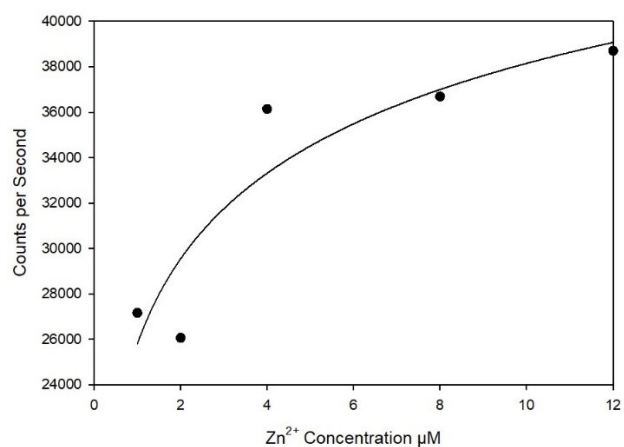

**Pyrazole (7) 20  $\mu$ M +  $\text{Zn}^{2+}$  Titration,  $\lambda_{\text{ex}}$  290 nm,  $\lambda_{\text{em}}$  480 nm**

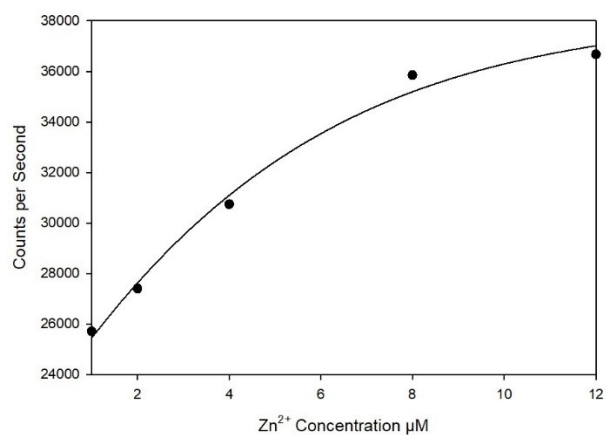

**Pyrazole (8) 20  $\mu$ M +  $\text{Zn}^{2+}$  Titration,  $\lambda_{\text{ex}}$  290 nm,  $\lambda_{\text{em}}$  480 nm**

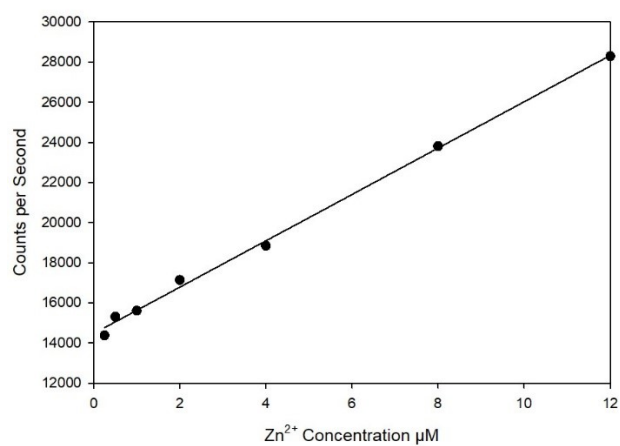

**Pyrazole (9) 20  $\mu$ M +  $\text{Zn}^{2+}$  Titration,  $\lambda_{\text{ex}}$  290 nm,  $\lambda_{\text{em}}$  480 nm**

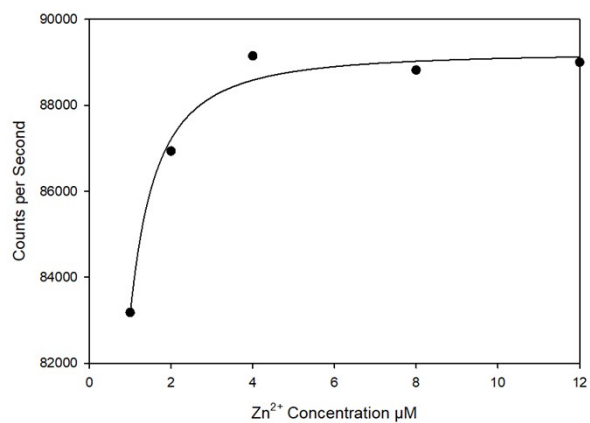



# Limit of Detection Calculations (S7)

The method reported by Lee *et al* was used to calculate limit of detection (LoD) for **4-9** in MeCN using the indicated cation with the average from three replicates used. For **6** +  $\text{Zn}^{2+}$  and **9** +  $\text{Zn}^{2+}$  an acceptable line of best fit could not be generated therefore detection limit > the highest used cation concentration was given at LoD.

B. P. Joshi, J. Park, W. I. Lee and K.-H. Lee, *Talanta*, 2009, **78**, 903.

**Pyrazoline (4) 20  $\mu\text{M}$ ,  $\lambda_{\text{ex}}$ 370 nm,  $\lambda_{\text{em}}$ 480 nm**

4-H Pyrazoline (4) +  $\text{Zn}^{2+}$

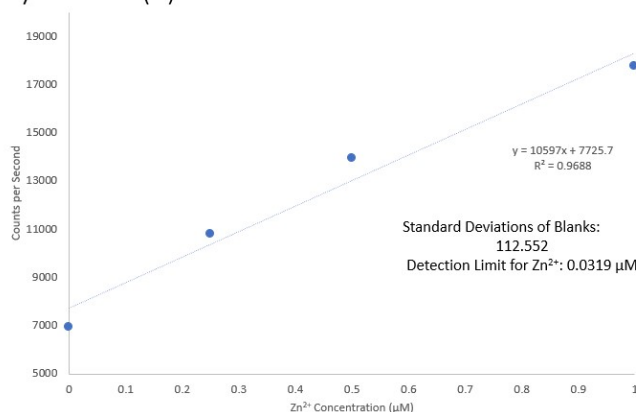

**Pyrazoline (5) 20  $\mu\text{M}$ ,  $\lambda_{\text{ex}}$ 370 nm,  $\lambda_{\text{em}}$ 480 nm**

4-F Pyrazoline (5) +  $\text{Zn}^{2+}$

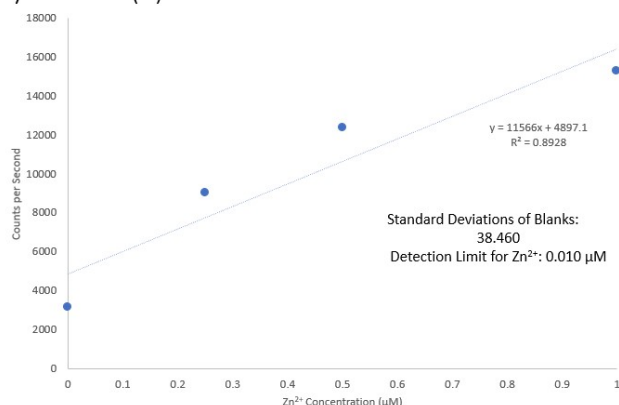

**Pyrazoline (6) 20  $\mu\text{M}$ ,  $\lambda_{\text{ex}}$ 370 nm,  $\lambda_{\text{em}}$ 480 nm**

4-OMe Pyrazoline (6) +  $\text{Zn}^{2+}$

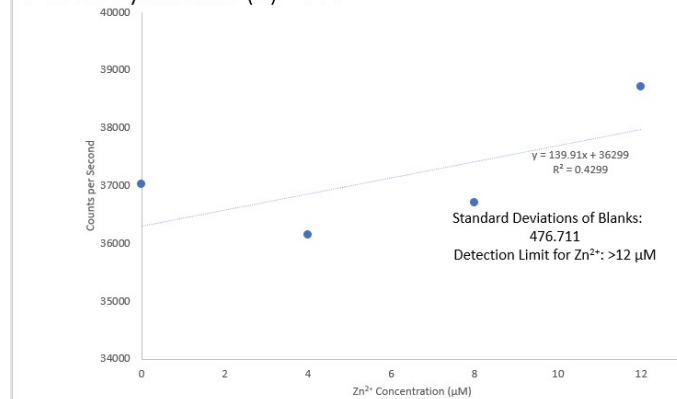

**Pyrazole (7) 20  $\mu\text{M}$ ,  $\lambda_{\text{ex}}$ 290 nm,  $\lambda_{\text{em}}$ 480 nm**

**4-H Pyrazole (7) +  $\text{Zn}^{2+}$**

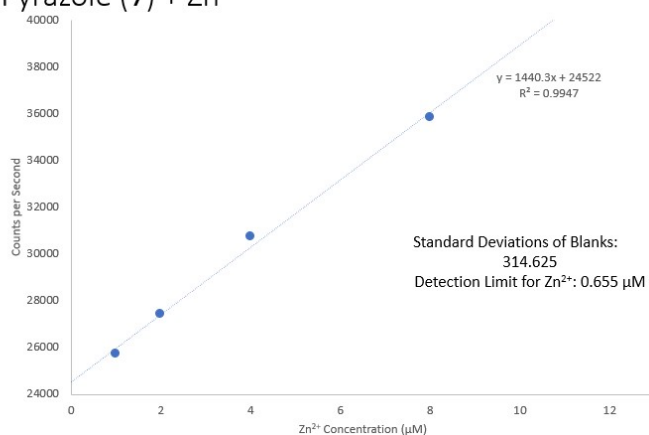

**Pyrazole (8) 20  $\mu\text{M}$ ,  $\lambda_{\text{ex}}$ 290 nm,  $\lambda_{\text{em}}$ 480 nm**

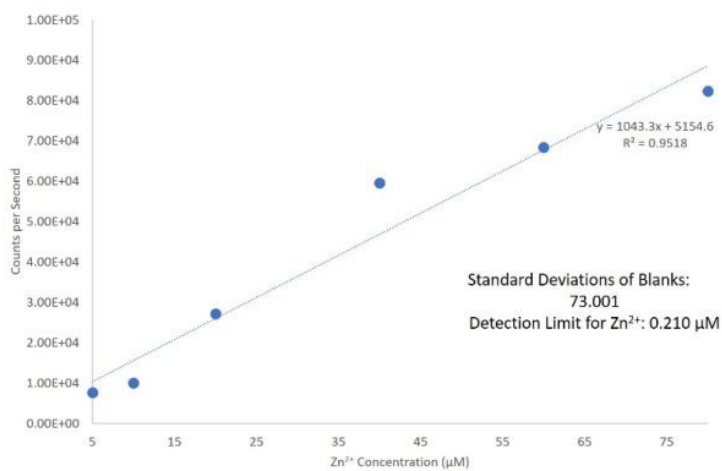

**Pyrazole (9) 20  $\mu\text{M}$  for  $\text{Zn}^{2+}$   $\lambda_{\text{ex}}$ 290 nm,  $\lambda_{\text{em}}$ 480 nm, for  $\text{Fe}^{3+}$   $\lambda_{\text{ex}}$ 290 nm,  $\lambda_{\text{em}}$ 465 nm**

**4-OMe Pyrazole (9) +  $\text{Zn}^{2+}$**

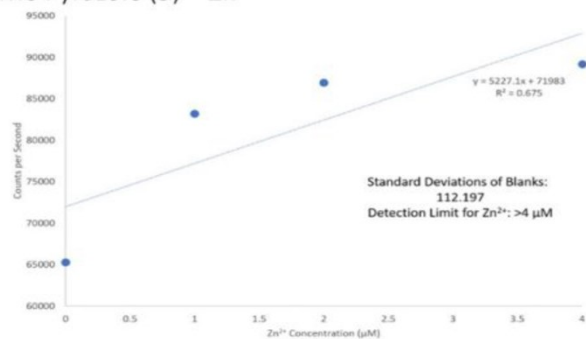

**4-OMe Pyrazole (9) +  $\text{Fe}^{3+}$**

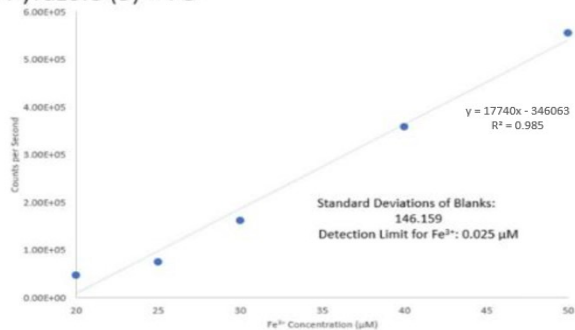

Supplement: d4ra00036f1.pdf [file d4ra00036f1.pdf]
